# Supplementary material for: The implicated clinical factors for outcomes in 304 patients with salivary duct carcinoma: Multi‐institutional retrospective analysis in Japan
Source: PubMed Central journal article supplement (PMC9311811; doi:10.1002/hed.27034), 2022-03-29
Supplement: HED-44-1430-s001.pdf [file HED-44-1430-s001.pdf]

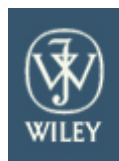

**The implicated clinical factors for outcomes in 304 patients with salivary duct carcinoma: A multi-institutional retrospective analysis in Japan**

|                               |                                                                                                                                                                                                                                                                                                                                                                                                                                                                                                                                                                                                                                                                                                                                                                                                                                                                                                                                                                                                                                                                                                                                                                                                                                                                                                                                                                                                                                                                                                                                                                                                                                                                                                                                                                                                                                                                                                                                                                                               |
|-------------------------------|-----------------------------------------------------------------------------------------------------------------------------------------------------------------------------------------------------------------------------------------------------------------------------------------------------------------------------------------------------------------------------------------------------------------------------------------------------------------------------------------------------------------------------------------------------------------------------------------------------------------------------------------------------------------------------------------------------------------------------------------------------------------------------------------------------------------------------------------------------------------------------------------------------------------------------------------------------------------------------------------------------------------------------------------------------------------------------------------------------------------------------------------------------------------------------------------------------------------------------------------------------------------------------------------------------------------------------------------------------------------------------------------------------------------------------------------------------------------------------------------------------------------------------------------------------------------------------------------------------------------------------------------------------------------------------------------------------------------------------------------------------------------------------------------------------------------------------------------------------------------------------------------------------------------------------------------------------------------------------------------------|
| Journal:                      | <i>Head &amp; Neck</i>                                                                                                                                                                                                                                                                                                                                                                                                                                                                                                                                                                                                                                                                                                                                                                                                                                                                                                                                                                                                                                                                                                                                                                                                                                                                                                                                                                                                                                                                                                                                                                                                                                                                                                                                                                                                                                                                                                                                                                        |
| Manuscript ID                 | HED-21-0246.R3                                                                                                                                                                                                                                                                                                                                                                                                                                                                                                                                                                                                                                                                                                                                                                                                                                                                                                                                                                                                                                                                                                                                                                                                                                                                                                                                                                                                                                                                                                                                                                                                                                                                                                                                                                                                                                                                                                                                                                                |
| Wiley - Manuscript type:      | Original Article                                                                                                                                                                                                                                                                                                                                                                                                                                                                                                                                                                                                                                                                                                                                                                                                                                                                                                                                                                                                                                                                                                                                                                                                                                                                                                                                                                                                                                                                                                                                                                                                                                                                                                                                                                                                                                                                                                                                                                              |
| Date Submitted by the Author: | 18-Dec-2021                                                                                                                                                                                                                                                                                                                                                                                                                                                                                                                                                                                                                                                                                                                                                                                                                                                                                                                                                                                                                                                                                                                                                                                                                                                                                                                                                                                                                                                                                                                                                                                                                                                                                                                                                                                                                                                                                                                                                                                   |
| Complete List of Authors:     | <p>Kusafuka, Kimihide; Shizuoka General Hospital, Department of Pathology<br/> Sato, Yoko; Shizuoka General Hospital, Division of Clinical Biostatistics, Research Support Center<br/> Nakatani, Eiji; Shizuoka General Hospital, Division of Clinical Biostatistics, Research Support Center<br/> Baba, Satoshi; Hamamatsu University School of Medicine Hospital, Department of Diagnostic Pathology,<br/> Maeda, Matsuyoshi; Toyohashi Municipal Hospital, Department of Clinical Pathology,<br/> Yamahegi, Koji; Hyogo Medical College, Department of Pathology<br/> Ueda, Kaori; Nagoya City University, Department of Pathology and Molecular Diagnostics<br/> Inagaki, Hiroshi; Nagoya City University; Nagoya City University, Department of Pathology and Molecular Diagnostics<br/> Otsuki, Yoshiro; Seirei Hamamatsu General Hospital, Department of Pathology,<br/> Kuroda, Naoto; Kobe Kyoudou Hospital, Department of Diagnostic Pathology<br/> Suzuki, Kensuke; Kansai Medical University Hirakata Hospital, Otolaryngology-Head and Neck surgery<br/> Iwai, Hiroshi ; Kansai Medical University, Department of Otorhinolaryngology-Head and Neck Surgery<br/> Imamura, Yoshiaki; University of Fukui Hospital, Division of Diagnostic Pathology/Surgical Pathology,<br/> Itakura, Junya; Kurashiki Central Hospital, Department of Anatomic Pathology<br/> Yamanaka, Shoji; Yokohama City University, Department of Diagnostic Pathology<br/> Takahashi, Hideaki; Yokohama City University, School of Medicine, Otorhinolaryngology, Head and Neck Surgery<br/> Ito, Ichiro; Nagano Red Cross Hospital, Department of Diagnostic Pathology<br/> Akashi, Takumi; Tokyo Medical and Dental University, Division of Surgical Pathology<br/> Daa, Tsutomu; Oita University School of Medicine Graduate School of Medicine, Department of Diagnostic Pathology,<br/> Hamada, Mei; Saitama Medical University International Medical Center, Department of Diagnostic Pathology,</p> |

1  
2  
3  
4  
5  
6  
7  
8  
9  
10  
11  
12  
13  
14  
15  
16  
17  
18  
19  
20  
21  
22  
23  
24  
25  
26  
27  
28  
29  
30  
31  
32  
33  
34  
35  
36  
37  
38  
39  
40  
41  
42  
43  
44  
45  
46  
47  
48  
49  
50  
51  
52  
53  
54  
55  
56  
57  
58  
59  
60

|            |                                                                                                                                                                                                                                                                                                                                                                                                                                                                                                                                                                                                                                                                       |
|------------|-----------------------------------------------------------------------------------------------------------------------------------------------------------------------------------------------------------------------------------------------------------------------------------------------------------------------------------------------------------------------------------------------------------------------------------------------------------------------------------------------------------------------------------------------------------------------------------------------------------------------------------------------------------------------|
|            | <p>Yasuda, Masanori; Saitama Medical University International Medical Center, Department of Pathology<br/>         Kawata, Ryo; Osaka Medical College, Department of Otorhinolaryngology-Head and Neck Surgery<br/>         Yamamoto, Hidetaka; Kyushu University, Anatomic Pathology<br/>         Tachibana, Yuri; Nagasaki University, Department of Pathology<br/>         Fukuoma, Junya; Nagasaki University<br/>         Muramatsu, Aya; Shizuoka General Hospital, Department of Pathology<br/>         Arai, Morikazu; Shizuoka General Hospital, Department of Pathology<br/>         Suzuki, Makoto; Shizuoka General Hospital, Department of Pathology</p> |
| Key Words: | salivary duct carcinoma, outcomes, competing-risk model, Japanese patient, distant metastasis                                                                                                                                                                                                                                                                                                                                                                                                                                                                                                                                                                         |
|            |                                                                                                                                                                                                                                                                                                                                                                                                                                                                                                                                                                                                                                                                       |

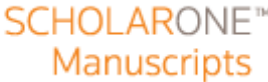

1

1 **Clinical factors affecting outcomes of 304 patients with salivary duct carcinoma: A**  
2 **multi-institutional retrospective analysis in Japan**

3  
4 Kimihide Kusafuka, D.D.S., Ph.D.<sup>1</sup> (k-kusafuka@i.shizuoka-pho.jp); Yoko Sato,  
5 D.D.S., Ph.D.<sup>2</sup> (sato.yoko.shiz@gmail.com); Eiji Nakatani, Ph.D.<sup>2</sup>  
6 (nakatani.eiji.int@gmail.com); Satoshi Baba, M.D., Ph.D.<sup>3</sup> (baba@hama-med.ac.jp);  
7 Matsuyoshi Maeda, M.D., Ph.D.<sup>4</sup> (maeda-matsuyoshi@toyohashi-mh.jp); <sup>5</sup>Koji  
8 Yamanegi, D.D.S, Ph.D.<sup>5</sup> (yamanegi@hyo-med.ac.jp); Kaori Ueda, D.M.D, Ph.D.<sup>6</sup>  
9 (kaori.u.0201@gmail.com); Hiroshi Inagaki, M.D., Ph.D.<sup>6</sup> (hinagaki@med.nagoya-  
10 cu.ac.jp); Yoshiro Otsuki, M.D., Ph.D.<sup>7</sup> (otsuki@sis.seirei.or.jp); Naoto Kuroda, M.D.,  
11 Ph.D.<sup>8</sup> (kurochankochi@yahoo.co.jp); Kensuke Suzuki, M.D.<sup>9</sup>  
12 (suzukken@hirakata.kmu.ac.jp); Hiroshi Iwai, M.D., Ph.D.<sup>9</sup> (iwai@hirakata.kmu.ac.jp);  
13 Yoshiaki Imamura, M.D., Ph.D.<sup>10</sup> (suki@u-fukui.ac.jp); Junya Itakura, M.D., Ph.D.<sup>11</sup>  
14 (ji14830@kchnet.or.jp); Shoji Yamanaka, M.D., Ph.D.<sup>12</sup>  
15 (kowanyamanaka@gmail.com); Hideaki Takahashi, M.D.<sup>13</sup> (htk98@yokohama-  
16 cu.ac.jp); Ichiro Ito, M.D., Ph.D.<sup>14</sup> (ichirito@nifty.com); Takumi Akashi, M.D., Ph.D.<sup>15</sup>  
17 (akashi.path@tmd.ac.jp); Tsutomu Daa, M.D., Ph.D.<sup>16</sup> (daatom@med.oita-u.ac.jp); Mei  
18 Hamada, D.D.S., Ph.D.<sup>17</sup> (de421042@s.okayama-u.ac.jp), Masanori Yasuda, M.D.,

2

1 Ph.D.<sup>17</sup> (m\_yasuda@saitama-med.ac.jp); Ryo Kawata, M.D., Ph.D.<sup>18</sup> (oto034@osaka-  
2 med.ac.jp); Hidetaka Yamamoto, M.D., Ph.D.<sup>19</sup> (hidetaka@surgpath.med.kyushu-  
3 u.ac.jp); Yuri Tachibana, D.M.D., Ph.D.<sup>20</sup> (y.tachibana19890221@gmail.com); Junya  
4 Fukuoka, M.D., Ph.D.<sup>20</sup> (fukuokaj@nagasaki-u.ac.jp); Aya Muramatsu, M.D., Ph.D.<sup>1</sup>  
5 (aya-muramatsu@i.shizuoka-pho.jp); Kazumori Arai, M.D., Ph.D.<sup>1</sup> (m-  
6 arai@ny.tokai.or.jp); Makoto Suzuki, M.D., Ph.D.<sup>1</sup> (makoto-suzuki@i.shizuoka-pho.jp)  
7  
8 <sup>1</sup>Department of Pathology and <sup>2</sup>Division of Clinical Biostatistics, Research Support  
9 Center, Shizuoka General Hospital, Shizuoka, Japan, <sup>3</sup>Department of Diagnostic  
10 Pathology, Hamamatsu University School of Medicine Hospital, Shizuoka, Japan,  
11 <sup>4</sup>Department of Clinical Pathology, Toyohashi Municipal Hospital, Aichi, Japan,  
12 <sup>5</sup>Department of Pathology Hyogo Medical College, Hyogo, Japan, <sup>6</sup>Department of  
13 Pathology and Molecular Diagnostics, Nagoya City University, Nagoya, Japan,  
14 <sup>7</sup>Department of Pathology, Seirei Hamamatsu General Hospital, Shizuoka, Japan,  
15 <sup>8</sup>Department of Diagnostic Pathology, Kobe Koudou Hospital Center, Hyogo, Japan,  
16 <sup>9</sup>Department of Otorhinolaryngology-Head and Neck Surgery, Kansai Medical  
17 University, Osaka, Japan, <sup>10</sup>Division of Diagnostic Pathology/Surgical Pathology,  
18 University of Fukui Hospital, Fukui, Japan, <sup>11</sup>Department of Anatomic Pathology,

3

- 1 Kurashiki Central Hospital, Okayama, Japan, <sup>12</sup>Department of Diagnostic Pathology,  
2  
3  
4  
5  
6  
7  
8  
9  
10  
11  
12  
13  
14  
15  
16  
17  
18  
19  
20  
21  
22  
23  
24  
25  
26  
27  
28  
29  
30  
31  
32  
33  
34  
35  
36  
37  
38  
39  
40  
41  
42  
43  
44  
45  
46  
47  
48  
49  
50  
51  
52  
53  
54  
55  
56  
57  
58  
59  
60
- 1 Kurashiki Central Hospital, Okayama, Japan, <sup>12</sup>Department of Diagnostic Pathology,  
2 <sup>13</sup>Department of Otorhinolaryngology-Head and Neck Surgery, Yokohama City  
3 University Graduate School of Medicine, Kanagawa, Japan, <sup>14</sup>Department of Diagnostic  
4 Pathology, Nagano Red Cross Hospital, Nagano, Japan, <sup>15</sup>Division of Surgical  
5 Pathology, Tokyo Medical and Dental University Hospital, Tokyo, Japan; <sup>16</sup>Department  
6 of Diagnostic Pathology, Oita University, Oita, Japan, <sup>17</sup>Department of Diagnostic  
7 Pathology, Saitama Medical University International Medical Center, Saitama, Japan,  
8 <sup>18</sup>Department of Otorhinolaryngology-Head and Neck Surgery, Osaka Medical College,  
9 Osaka, Japan, <sup>19</sup>Department of Anatomic Pathology, Kyushu University, Fukuoka,  
10 Japan and <sup>20</sup>Department of Pathology, Nagasaki University, Nagasaki, Japan

11

12 **Correspondence to:** Dr. Kimihide Kusafuka, D.D.S., Ph.D.

13 Department of Pathology, Shizuoka General Hospital

14 4-27-1 Kita-ando, Aoi-ku, Shizuoka city, Shizuoka 420-8527, Japan

15 TEL.: +81-54-247-6111

16 E-mail: k-kusafuka@i.shizuoka-pho.jp

17

18 **Brief running title:** Clinical analysis of SDC in Japanese

4

1

2 **Keywords:** salivary duct carcinoma, outcomes, competing-risk model, Japanese patient

3

#### 4 **Acknowledgments:**

5 The authors thank Mr. Naofumi Ishikawa, Ms. Yoko Yamazaki, Mr. Tomohiro Iwasaki,

6 Ms. Chinatsu Tsuchiya, Ms. Aki Kubota, Mr. Kensuke Shimazaki, Mr. Kazuki Hirata,

7 Mr. Koji Takahashi, Ms. Nobuyo Tsujino, and Mr. Yosuke Saguchi, the co-medical

8 staff of Department of Pathology, Shizuoka General Hospital, Shizuoka, Japan, for

9 providing technical assistance. We are grateful to Ms. Mamiko Uemura, secretariat,

10 Department of Pathology, Shizuoka General Hospital, Shizuoka, Japan.

11

12

#### 13 **Author contributions**

14 KK designed and drafted the manuscript, and KK, AM, KA, and MS made the

15 histopathological diagnosis for the central pathological review. KK, SB, MM, KY,

16 KU, HIn, YO, NK, KS, HIw, YI, JI, SY, HT, II, TA, TD, MH, YY, RK, and HY

17 selected cases and provided samples with pathological and clinical data. KK, YS, and

5

1 EN performed statistical analyses of all data. MS supervised this manuscript. All of the  
2 authors have read and approved the final manuscript.

3

#### 4 **Funding**

5 This work was supported in part by a Grant-in-Aid for Science Research from the  
6 Ministry of Education, Culture, Sports, Science and Technology of Japan (15K08351 to  
7 HIn) and a Grant-in-Aid for Medical Research Support Project of Shizuoka Prefectural  
8 Hospital Organization in 2019 of Japan (to KK).

9

10

#### 11 **Competing interests**

12 The authors declare that they have no competing interests related to this study.

13

#### 14 **Ethical approval and consent to participate**

15 The present study was approved by the Institutional Review Board of Shizuoka  
16 General Hospital (SGHIRB#2019007). All subjects signed informed consent forms  
17 before participating.

18

#### 19 **Availability of data and materials**

20 The datasets used and analyzed during the present study are available from the  
21 corresponding author upon reasonable request.

22

23

24

25

6

**Abstract:**

**Background.** Salivary duct carcinoma (SDC) is a high-grade salivary malignancy that frequently occurs as the carcinomatous component of carcinoma ex pleomorphic adenoma. We herein examined the clinical factors affecting outcomes in a large cohort of SDC.

**Methods.** We selected 304 SDC cases and investigated clinical characteristics and the factors affecting outcomes.

**Results.** The median age of the cases examined was 68 years, the most common primary site was the parotid gland (238 cases), and there was a male predominance (M/F=5:1). Outcomes were significantly worse when the primary tumor site was the minor salivary glands (SG) than when it was the major SG. Outcomes were also significantly worse in pN(+) cases (161 cases) than in pN0 cases, particularly those with a metastatic lymph node number  $\geq 11$ . The cumulative incidence of relapse and distant metastases was significantly higher in stage IV cases than in stage 0-III cases.

**Conclusions.** The absolute number of lymph node metastases, higher stages, and the minor SG as the primary tumor site were identified as factors affecting the outcome of SDC.



7

## 1 **Introduction**

2 Salivary duct carcinoma (SDC) is a high-grade malignant tumor of the salivary  
3 glands (SG) [1]. However, it frequently occurs as the carcinomatous component of  
4 carcinoma ex pleomorphic adenoma (CXPA) [2]. Although SDC shares histological  
5 similarities with invasive ductal carcinoma of the breast, it typically shows an apocrine  
6 phenotype, which differs from the immunophenotypes (estrogen receptor [ER]+ and/or  
7 progesterone receptor [PgR]+) of breast cancer; the majority of SDC cases were  
8 immunohistochemically negative for ER and/or PgR, but variably positive for the  
9 androgen receptor (AR) and gross cystic disease fluid protein-15 [1,3]. Boon et al.  
10 previously reported that the absolute number of positive lymph nodes (LN) was  
11 associated with a poor overall survival (OS) and distant metastasis-free survival  
12 (DMFS) in a multivariable analysis of patients presenting without distant metastases in  
13 the Netherlands [4]. In contrast, Otsuka et al. showed that an advanced N stage  
14 independently affected both OS and disease-free survival (DFS) [5]. Therefore, the  
15 present study investigated the clinical features of SDC and attempted to identify the  
16 clinical factors affecting outcomes in the largest cohort of SDC patients in Japan.

## 17 **Materials and methods**

8

## 1 Case selection

2 We initially collected data on 392 cases of “SDC”, “CXPA”, and “adenocarcinoma”  
3 from the pathology files of 18 institutions and a set of consultation files (from K.K.)  
4 between 1992 and 2020. Among them, SDC cases, including CXPA cases, were  
5 extracted from the central diagnostic system by four expert pathologists (K.K., A.M.,  
6 K.A., and M.S.: Supplemental Figure 1). The following clinical data were collected  
7 from the medical records of each institution: age, sex, site, treatments, TNM  
8 classification, pathological stage, outcome, and follow-up data. Tumors were staged  
9 according to the eighth edition of the TNM Classification of Malignant Tumours [6].  
10 Hashimoto’s classification for T factors and pathological stages was used to stage  
11 CXPA [7]: intracapsular (IC), minimally invasive (MinI), and widely invasive (WI),  
12 based on the invasive distance from the fibrous capsule, with MinI being  $\leq 2$  mm from  
13 the fibrous capsule of a co-existing pleomorphic adenoma (PA) and WI  $> 2$  mm from the  
14 capsule

15

## 16 Statistical analysis

17 OS was measured from the date of diagnosis until death by any cause. Patients alive  
18 at the last known follow-up date were censored. The cumulative incidence of relapse

9

(CIR) was defined as the number of cases in which local or regional recurrence or distant metastasis occurred after the primary surgery, regardless of which occurred first. Patients that were alive without disease at the last known follow-up examination were censored for the purposes of the DFS analysis. The cumulative incidence of distant metastasis relapse (CIDMR) was defined as the number of cases in which distant metastasis occurred after the primary surgery. Frequencies and percentages were used for categorical variables. Survival curves were estimated by the Kaplan-Meier method and cumulative incidence curves using a competing-risk model analysis with Grey's test when the competing-risk event was death [8,9]. A univariate Cox proportional hazards regression model or Fine-Grey proportional hazard regression model was used for comparisons of patient and tumor characteristics and survival. A multivariate Cox proportional hazards regression model or Fine-Grey proportion hazard regression model was then performed by adjusting variables with P-values <0.05 in the univariate analysis. Hazard ratios, 95% confidence intervals (CI), and corresponding P-values were calculated based on the Wald test. The variables used in regression models for the cumulative accumulation of the overall incidence, relapse incidence, late cervical LN metastasis (CLNM), and distant metastasis incidence included sex, age (categorical), the T-, N-, and M-status, pathological stage, number of positive LN (categorical), CXPA,

10

1 and the primary tumor site. We also investigated the pattern of treatment failure,  
2 including locoregional recurrence and distant metastasis. Patients with metastatic  
3 disease at diagnosis and those with missing values for one or more of the variables were  
4 excluded from the multivariable analysis. Data were analyzed using R version 3.6.2  
5 software (The R Foundation for Statistical Computing, Vienna, Austria).

## 7 **Results**

### 8 Patient and tumor characteristics

9 A central pathological review and preserved data led to the inclusion of 304 eligible  
10 SDC cases from 392 cases in the initial collection (Figure 1). Patient characteristics are  
11 shown in Table 1. Median age was 68 years (range: 27-91) and there was a male  
12 predominance (83%). Although the univariate analysis of OS showed poorer outcomes  
13 for males than for females, a significant difference was not observed in the multivariate  
14 analysis. The most common primary tumor site was the parotid gland in 238 out of 304  
15 cases (78%), followed by the submandibular gland in 55 (18%), and then the sublingual  
16 gland (1 case), palate (5 cases), parapharynx (2 cases), buccal gland (1 case), nasal  
17 cavity (1 case), and intraoral minor SG (1 case). Sixty-nine cases (23%) had Tis and T1  
18 as early cancer, whereas 71 (23%), 79 (26%), and 80 (26%) had T2, T3, and T4,

11

1 respectively, as advanced cancer. CLNM was detected in 161 cases (53%) in the  
2 primary surgery. Distant metastases were detected in 19 cases (6.3%). Based on the  
3 histological origin, the 304 SDC cases selected for the present study comprised 122  
4 (40%) of *de novo* SDC and 182 (60%) of SDC arising from PA (CXPA cases),  
5 including 47 of the IC subtype, 23 of the MinI subtype, and 112 of the WI subtype.  
6 Pathological stages were as follows: stages 0-I in 59 cases (20%), stages II and III in 78  
7 (26%), and stage IV in 156 (51%).

8 The most frequent target organs for late distant metastases (n=93) were the lungs  
9 (61 cases: 66%), followed by bone (32 cases: 34%), the central nervous system (19  
10 cases: 20%), including the brain, meninges, and spine, distant LN (13 cases: 14%),  
11 including the mediastinal, axillary, and/or abdominal LN, the liver (11 cases: 12%), skin  
12 (8 cases: 8.6%), and other organs (4 cases), including the thyroid gland, breast, tongue,  
13 and kidney.

14

#### 15 Therapy

16 A total of 107 patients underwent surgery only, while 197 received post-operative  
17 radiotherapy [RT] (102 patients: 52%), adjuvant chemotherapy [Ch] (13 patients:  
18 6.6%), adjuvant chemoradiotherapy [CRT] (70 patients: 36%), and additional surgery (5

12

1 patients: 2.5%) after the primary surgery (Supplemental Table 1). After the primary  
2 surgery, 25, 30, and 93 patients showed local recurrence, late CLNM (regional relapse),  
3 and distant metastasis, respectively. Among 110 patients with recurrence, five  
4 underwent additional surgery, while 102, 11, and 70 received additional RT, Ch, and  
5 CRT, respectively. Only 3 out of 61 patients with lung metastases recovered from the  
6 status of being alive with disease to the status of being alive without disease with  
7 additional surgery and RT for metastatic lesion(s).

## 8 9 Clinical outcomes and survival analysis

10 The median follow-up period was 2.93 years (minimum-maximum: 0.01-21.70  
11 years). At the time of the analysis, 149 patients were alive without disease, 66 died of  
12 disease, 38 were alive with disease, and 19 died of other causes. Kaplan-Meier curves  
13 for OS, DFS, and DMFS are shown in Figure 2. The cumulative incidence rates of 1-  
14 and 5-year relapse were 26.2% (95% confidence interval [CI], 20.7-32.1%) and 49.0%  
15 (95%CI 41.9-55.7%), respectively. The cumulative incidence rates of 1- and 5-year  
16 local relapse (CILR), CLNM (CICLNM), and CIDMR were 7.0% (95%CI, 4.2-10.8%)  
17 12.0% (95% CI, 8-16.9%), and 7.0% (95% CI, 4.2-10.8), and 12.0% (95% CI, 8-

13

1 16.9%), 20.3% (95% CI, 15.4-25.7%), and 41.6% (95% CI, 34.7-48.4%), respectively  
2 (Supplemental Figures 1 and 2).

3 Cumulative incidence curves stratifying prognostic factors identified by univariate  
4 and multivariate regression models are shown in Figures 3 and 4 and Supplemental  
5 Figures 2 and 3, whereas those analyzed by the Fine-Grey proportional hazards model  
6 are shown in Tables 2 and 3. OS was significantly worse in patients with a higher  
7 pathological stage and larger number of LN metastases ( $p < 0.001$ : 0 vs 1-10 vs  $\geq 11$   
8 cancer-positive nodes). On the other hand, no significant differences were observed in  
9 CIR, CILR, CICLNM, and CIDMR between *de novo* (CXPA[-]) and CXPA-WI cases,  
10 whereas OS, CIR, CILR, CICLNR, and CIDMR were better in CXPA-IC/MinI cases  
11 than in *de novo* and CXPA-WI cases. The multivariate analysis identified stage IV  
12 ( $p < 0.001$  vs. stages 0, I, II, and III, respectively) and  $\geq 11$  positive LN ( $p = 0.028$ ; vs. no  
13 LN metastasis) as independent prognostic factors for OS. In addition to stage IV,  $\geq 11$   
14 positive LN ( $p < 0.001$ ; vs. no LN metastasis) and minor SG as the primary tumor site  
15 ( $p < 0.001$  and  $p = 0.003$ ; vs the parotid gland and submandibular gland, respectively)  
16 were identified as strongly independent factors for CIR. Similarly, minor SG as the  
17 primary tumor site ( $p < 0.001$  and  $p = 0.012$ ; vs. the parotid gland and submandibular  
18 gland, respectively), stage IVA/B ( $p = 0.005$ ; vs. stages 0, I, II, and III), and  $\geq 11$  positive

14

1 LN ( $p < 0.001$ ; vs. no LN metastasis) were also independent prognostic factors for

2 CIDMR.

3

4 Patterns of treatment failure

5 As shown in Figure 5A, treatment failure occurred in 110 cases (36%), including 25

6 (8.2%) local, 30 (9.9%) regional, and 93 (31%) distant failures, of which 65 (59%) were

7 without locoregional failure. As shown in Figure 5B, the most common sites of distant

8 metastasis were the lungs ( $n = 61$  cases), followed by bone ( $n = 32$  cases), the central

9 nervous system ( $n = 19$  cases), distant LN ( $n = 13$  cases), the liver ( $n = 11$  cases), and skin

10 ( $n = 8$  cases). Pre-operative distant metastases were detected in 19 patients (cM1: lungs,

11 10 cases; liver, 3 cases; bone, 4 cases; axillary LN, 1 case; pleurae 1 case). Among cM1

12 cases, 11 died of disease and 5 were alive with disease.

13

#### 14 Discussion

15 The present study examined 304 SDC cases, which represents the largest cohort of

16 SDC reported to date, and provides extensive insights into the clinical outcomes,

17 treatment, and prognostic factors of SDC. The results obtained support an aggressive

18 clinical course in spite of the lower rate of distant metastases (31%) than in Boon's



15

1 retrospective study [4] and a median OS of 11.61 years. In the study by Boon, the  
2 number of positive LN was the only factor independently associated with poor OS and  
3 DMFS [4]. Previous studies reported that 5-year OS rates in patients with SDC ranged  
4 between 12 and 55%: the weighted average of five-year DFS and OS rates were 46 and  
5 35%, respectively [9-17]. The majority of studies on the clinical outcome of SDC  
6 presented data from a single institution. However, Jayaprakash et al. [18] conducted an  
7 analysis of 228 patients using the Surveillance, Epidemiology, and End Results  
8 database. The findings obtained showed that the 10-year OS rate was 42% and median  
9 OS was 79 months, with the majority of deaths occurring within the first five years of  
10 the diagnosis of SDC [18]. Even in patients with early T stage SDC, the overall  
11 prognosis was poor (five-year DFS and OS rates of 49%) [16]. Otsuka et al. [5] reported  
12 3-year OS and DFS rates of 70.5 and 38.2%, respectively, in 141 SDC cases from  
13 multiple institutions, showed that an advanced N stage independently affected both OS  
14 and DFS, and identified the most common treatment failure as distant metastasis. In the  
15 present study, the most common treatment failure in SDC patients was also distant  
16 metastasis. Although another analysis of a larger cohort (n=56) subsequently showed  
17 similar outcomes, with 3- and 5-year OS rates of 42.7 and 26.9%, respectively, recent  
18 studies with similar cohort sizes reported a better 5-year OS rate of 55.1%, suggesting

16

1 the benefits of the intensification of both surgery and adjuvant RT for treatment  
2 outcomes [12,19,20]. However, marked differences were observed between OS and  
3 DFS; the 5-year DFS was 29% in one study [19], whereas Otsuka et al. [5] indicated 3-  
4 year OS and DFS rates of 70.5% and 38.2%, respectively. This discrepancy reflects the  
5 markedly high ratio of treatment failure for SDC. In the present study, 3-, 5- and 10-  
6 year CIR were 46.3, 49.0, and 57.4%, respectively (3-, 5-, and 10-year DFS rates were  
7 48.5, 41.7, and 32.6%, respectively; data not shown). In our cohort, Three-year DFS  
8 was slightly better in the present study than previously reported [5,12,18,19], which  
9 may be attributed to advances in post-operative therapies.

10 In the present study, a higher pathological stage, which was associated with  
11 advanced T and N factors, and large numbers of cancer-positive LN were identified as  
12 independent prognostic factors. Boon et al. [4] and Otsuka et al. [5] indicated that  
13 advanced N factors and/or the number of positive LN correlated with OS and DFS or  
14 DMFS. In the present study, an advanced N factor (N0 vs N2/N3) and  $\geq 11$  cancer-  
15 positive LN correlated with poor 5-year OS, 5-year CIR, and 5-year CIDMR. These  
16 were consistent with previous studies [4,5]. SDC had higher incidences of LN and  
17 distant metastases than those reported by Osborn (46.5%) and Jayaprakash et al. (49%),  
18 respectively [18,21]. In the present study, outcomes were worse in cases with minor SG

17

1 than in those with the parotid gland and submandibular gland as the primary tumor site.  
2  
3  
4  
5  
6  
7  
8  
9  
10 Since standard therapeutic strategies have not yet been established for SDC cases in  
11  
12  
13  
14  
15  
16  
17  
18  
19  
20  
21  
22  
23  
24  
25  
26  
27  
28  
29  
30  
31  
32  
33  
34  
35  
36  
37  
38  
39  
40  
41  
42  
43  
44  
45  
46  
47  
48  
49  
50  
51  
52  
53  
54  
55  
56  
57  
58  
59  
60

1 than in those with the parotid gland and submandibular gland as the primary tumor site.  
2 Since standard therapeutic strategies have not yet been established for SDC cases in  
3 which minor SG is the primary tumor site, and, thus, adequate therapies were not  
4 performed for these cases, their outcomes were worse. Furthermore, a negative surgical  
5 margin may not have been achieved in these cases, resulting in incomplete resection.  
6 Therefore, clinicians need to consider these factors in cases of SDC arising from minor  
7 SG.

8 In the statistical analyses, we mainly used competing-risk analysis, in which death  
9 was employed as a competing risk, to analyze the cumulative incidence of relapse, local  
10 relapse, LN metastasis, and distant metastasis in order to produce more precise  
11 statistical results. Kaplan-Meier curve analysis frequently leads to the cumulative risk  
12 that patients are exposed to being overestimated, and when a competing risk is present  
13 the cumulative risk of patients with certain diseases is not as high as the cumulative risk  
14 indicated by the Kaplan-Meier method [9,22,23].

15 Otsuka et al. [5] (n=141) and Jayaprakash et al. [18] (n=228) identified age and the  
16 N factor as independent prognostic factors for OS and DFS/disease-specific survival, in  
17 addition to the tumor size and grade in a multivariate analysis. However, a correlation  
18 was not observed between age and outcomes in the 304 SDC cases examined in the

18

1 present study. However, LN metastasis (N[+]) was associated with worse OS, CIR,  
2 C1CLNM, and CIDMR than N0 cases, and was one of the independent factors  
3 predicting a poor outcome.

4 In our cohort, the most common form of treatment failure was late distant  
5 metastases (n=93 in our series), which is consistent with the findings from smaller  
6 cohorts [11,20,24] and a larger cohort [5]. Previous studies identified the lungs and  
7 bone as the most common sites of distant metastasis in SDC [5,12,21,25], which is in  
8 accordance with the present results. A high ratio of distant metastases is presumed to be  
9 the leading cause of high CIR and CIDMR or low DFS and DMFS. Although extended  
10 resection with wider margins combined with intensified adjuvant RT appear to have  
11 contributed to better treatment outcomes in SDC patients by improving locoregional  
12 control, these strategies alone cannot prevent the development of delayed distant  
13 metastasis. Therefore, effective systemic therapy after curative surgery is imperative for  
14 improving CIR and CIDMR in SDC patients. Immunohistochemical studies revealed  
15 the expression of AR in 69-100% of SDC cases [25-27], whereas that of HER2 was  
16 only observed in 26-77%, both of which were confirmed in other reports, suggesting a  
17 potential role for agents targeting these receptors in molecular-targeted therapy for SDC  
18 [5,28,29]. Despite the focal or heterogenous expression of AR, androgen deprivation

19

1 therapy (ADT) was found to be clinically beneficial for patients with AR-positive SDC,  
2 with 18% achieving a partial response and 50% stable disease in addition to longer DSF  
3 [30–32]. However, some cases acquire resistance to ADT due to the aberrant expression  
4 of SRD5A1 and loss of FOXA1 expression [33,34]. The administration of trastuzumab  
5 and docetaxel to patients with HER2-positive SDC achieved a good overall response  
6 (70.2%; 95%CI, 56.6-81.6%), including partial and complete responses, and was  
7 clinically beneficial (84.2%; 95%CI, 72.1-92.5%), with increases in OS and  
8 progression-free survival [35]. Since the status of patients with early or late distant  
9 metastasis is systemic, novel chemotherapy regimens are needed, such as ADT for AR-  
10 positive SDC and/or trastuzumab therapy for HER2-positive SDC [36]. Similar to our  
11 cohort, only a few patients have been treated with ADT or trastuzumab and, thus, the  
12 therapeutic effects of these agents remain unclear. AR, HER2, and EGFR profiles in  
13 SDC patients in our series are currently being investigated.

14 In the present study, the outcomes of SDC ex-PA-WI and *de novo* SDC were both  
15 poor, whereas that of SDC ex-PA-IC/MinI was better. Hashimoto's classification was  
16 used in the present study to stage CXPA [7] because the TNM classification focused on  
17 the extent of invasion of carcinoma and not the tumor size; since CXPA-IC cases may  
18 exhibit large tumors, and CXPA-WI cases small tumors. Since the extent of invasion of

20

1  
2  
3  
4  
5  
6  
7 1 MinI CXPA markedly varies between 1.5 and 8 mm in the 4th WHO classification, we  
8  
9 2 established MinI  $\leq 2$  mm from the fibrous capsule of a co-existing PA for a more  
10  
11 3 practical and easily measurable value. Few studies have investigated differences  
12  
13 4 between CXPA(-) and CXPA(+) cases [4,10]. Griffith et al. showed that OS was  
14  
15 5 significantly worse in extracapsular invasive-type SDC ex-PA than in IC-type SDC ex-  
16  
17 6 PA [37]. IC-type SDC ex-PA is an indolent tumor, whereas invasive-type SDC ex-PA is  
18  
19 7 an aggressive tumor, similar to *de novo* SDC; therefore, WI-type SDC ex-PA need to be  
20  
21 8 added to the analytical cohort. In our series, nine out of the 47 cases of IC-type SDC ex-  
22  
23 9 PA died mainly due to other diseases except for one case. Therefore, IC-type SDC ex-  
24  
25 10 PA has a better outcome than invasive SDC.

26  
27 11 In conclusion, SDC frequently occurs in major SG, mostly in the parotid gland;  
28  
29 12 however, outcomes are worse in minor SG cases than in major SG cases. A high N  
30  
31 13 factor, particularly large numbers ( $11 \geq$ ) of cancer-positive LN, or high pathological  
32  
33 14 stage were identified as factors contributing to a worse prognosis, and the main reason  
34  
35 15 for treatment failure was delayed distant metastases.

16

17

18 **References**

- 1 1. Nagao T, Licitra L, Loening T, Vielh P, Williams MD. “Salivary duct carcinoma”  
2 (eds.) El-Nagger A, Chan JKC, Grandis JR, Takata T. Slootweg PJ. WHO  
3 classification of head and neck tumours. Lyon, IARCPress, 2017:173-174.
- 4 2. Williams MD, Ihrler S, Seethala R. “Carcinoma ex pleomorphic adenoma” (eds.)  
5 EL-Nagger A, Chan JKC, Grandis JR, Takata T. Slootweg PJ. WHO classification  
6 of head and neck tumours. Lyon, IARCPress, 2017: 176-177.
- 7 3. Kapadia SB, Barns L. Expression of androgen receptor, gross cystic disease fluid  
8 protein, and CD44 in salivary duct carcinoma. *Mod Pathol* 1998;11:1033-1038.
- 9 4. Boon E, Bel M, van Boxtel, et al. A clinicopathological study and prognostic factor  
10 analysis of 177 salivary duct carcinoma patients from the The Netherlands. *Int J*  
11 *Cancer* 2018;143: 758-766.
- 12 5. Otsuka K, Imanishi Y, Tada Y, et al. Clinical outcomes and prognostic factors for  
13 salivary duct carcinoma: A multi-institutional analysis of 141 patients. *Ann Surg*  
14 *Oncol* 2016; 23: 2038-2045.
- 15 6. Brierley JD, Gospodarowicz MK, Wittekind C, O’Sullivan B, Mason M, Asamura  
16 H, Lee A, Van Eycken E, Denny L, Amin MB, Gupta S. (eds.) Union for  
17 International Cancer Control: TNM Classification of Malignant Tumours: The 8th  
18 ed., John Wiley & Sons. Ltd. Sussex, UK. 2017: 47-50.

22

- 1 7. Hashimoto K, Yamamoto H, Shiratsuchi H, et al. S100P expression in ductal type  
2 of carcinoma ex pleomorphic adenoma. *Am J Surg Pathol* 2011; 35: 346-365.
- 3 8. Kim HT. Cumulative incidence in competing risks data and competing risks  
4 regression analysis. *Clin Cancer Res* 2007; 13(2 Pt 1): 559-565.
- 5 9. Lacoppidan T, Vogelius IR, Pohl M, Strange M, Persson GF, Nygard L. An  
6 investigative expansion of a competing risk model for first failure site in locally  
7 advanced non-small cell lung cancer. *Acta Oncol* 2019; 58: 1386-1392.
- 8 10. Schmitt NC, Kang H, Sharma A. Salivary duct carcinoma: An aggressive salivary  
9 gland malignancy with opportunities for targeted therapy. *Oral Oncol* 2017; 74: 40-  
10 48.
- 11 11. Breinholt H, Elhakim MT, Godballe C, et al. Salivary duct carcinoma: A Danish  
12 national study. *J Oral Pathol Med* 2016; 45: 664-667.
- 13 12. Kim JY, Lee S, Cho KJ, et al. Treatment results of post-operative radiotherapy in  
14 patients with salivary duct carcinoma of the major salivary glands. *Br J Radiol*  
15 2012; 85: e947-e952.
- 16 13. Guzzo M, Di Palma S, Grandi C, Molinari R. Salivary duct carcinoma: Clinical  
17 characteristics and treatment strategies. *Head Neck* 1997; 19: 126-133.



- 1  
2  
3  
4  
5  
6  
7  
8  
9  
10  
11  
12  
13  
14  
15  
16  
17  
18  
19  
20  
21  
22  
23  
24  
25  
26  
27  
28  
29  
30  
31  
32  
33  
34  
35  
36  
37  
38  
39  
40  
41  
42  
43  
44  
45  
46  
47  
48  
49  
50  
51  
52  
53  
54  
55  
56  
57  
58  
59  
60
- 1 14. Shinoto M, Shioyama Y, Nakamura K, et al. Postoperative radiotherapy in patients  
2 with salivary duct carcinoma: clinical outcomes and prognostic factors. *J Radiat*  
3 *Res* 2013; 54: 925-930.
- 4 15. Salovaara E, Hakala O, Back L, et al. Management and outcome of salivary duct  
5 carcinoma in major salivary glands. *Eur Arch Otorhinolaryngol* 2013; 270: 281-  
6 285.
- 7 16. Schimitt NC, Sharma A, Gilbert MR, Kim S. Early T stage salivary duct  
8 carcinoma: outcomes and implications for patient counseling. *Otolaryngol Head*  
9 *Neck Surg* 2015; 153: 795-798.
- 10 17. Villepelt A, Lefevre M, Verillaud B, et al. Salivary duct carcinoma: Prospective  
11 multicenter study of 61 cases of the Reseau d'Expertise Francais des Cancers ORL  
12 Rares. *Head Neck* 2018; 41: 584-591.
- 13 18. Jayaprakash V, Merzianu M, Warren GW, et al. Survival rates and prognostic  
14 factors for infiltrating salivary duct carcinoma: analysis of 228 cases from the  
15 Surveillance, Epidemiology, and End Results database. *Head Neck* 2014; 36: 694-  
16 701.

24

- 1  
2  
3  
4  
5  
6  
7  
8  
9  
10  
11  
12  
13  
14  
15  
16  
17  
18  
19  
20  
21  
22  
23  
24  
25  
26  
27  
28  
29  
30  
31  
32  
33  
34  
35  
36  
37  
38  
39  
40  
41  
42  
43  
44  
45  
46  
47  
48  
49  
50  
51  
52  
53  
54  
55  
56  
57  
58  
59  
60
- 1 19. Roh JL, Lee JI, Choi SH, et al. Prognostic factors and oncologic outcomes of 56  
2 salivary duct carcinoma patients in a single institution: high rate of systemic failure  
3 warrants targeted therapy. *Oral Oncol* 2014; 50: e64-e66.
- 4 20. Johnston ML, Huang SH, Waldron JN, et al. Salivary duct carcinoma: Treatment,  
5 outcomes, and patterns of failure. *Head Neck* 2016; 38 (Suppl 1): E820-E826.
- 6 21. Osborn V, Givi B, Lee A, et al. Characterization, treatment and outcomes of  
7 salivary duct carcinoma using the National Cancer Database. *Oral Oncol* 2017; 7:  
8 41-46.
- 9 22. Yang J, Pan Z, He Y, et al. Competing-risk model for predicting the prognosis of  
10 penile cancer based on the SEER database. *Cancer Med* 2019; 8: 7881-7889.
- 11 23. Yu X, Gao S, Xue Q, et al. Development of a predictive nomogram for cause-  
12 specific mortality in surgically resected early-stage oesophageal cancer: a  
13 Surveillance, Epidemiology, and End Results (SEER) analysis. *J Thorac Dis* 2020;  
14 12: 2583-2594.
- 15 24. Gilbert MR, Sharma A, Schmitt NC, et al. A 20-year review of 75 cases of salivary  
16 duct carcinoma. *JAMA Otolaryngol Head Neck Surg* 2016; 142: 489-495.

25

- 1  
2  
3  
4  
5  
6  
7  
8  
9  
10  
11  
12  
13  
14  
15  
16  
17  
18  
19  
20  
21  
22  
23  
24  
25  
26  
27  
28  
29  
30  
31  
32  
33  
34  
35  
36  
37  
38  
39  
40  
41  
42  
43  
44  
45  
46  
47  
48  
49  
50  
51  
52  
53  
54  
55  
56  
57  
58  
59  
60
- 1 25. Jaehne M, Roeser K, Jaeket T, Schepers JD, Albert N, Loning T. Clinical and  
2 immunohistochemical typing of salivary duct carcinoma: a report of 50 cases.  
3 Cancer 2005; 103: 2526-2533.
- 4 26. Locati, LD, Perrone F, Losa M, et al. Treatment relevant target immunophenotyping  
5 of 139 salivary gland carcinomas (SGCs). Oral Oncol 2009; 45: 986-900.
- 6 27. Kapadia SB, Barnes L. Expression of androgen receptor, gross cystic disease fluid  
7 protein, and CD44 in salivary duct carcinoma. Mod Pathol 1998; 11: 1033-1038.
- 8 28. Fan CY, Wang J, Barnes EL. Expression of androgen receptor and prostatic specific  
9 markers in salivary duct carcinoma: an immunohistochemical analysis of 13 cases  
10 and review of the literature. Am J Surg Pathol 2000; 24: 579-586
- 11 29. Xu B, Dogan S, Haroon Al Rasheed MR, Ghossein R, Katabi N. Androgen receptor  
12 immunohistochemistry in salivary duct carcinoma: A retrospective study 188 cases  
13 focusing on tumor heterogeneity and temporal concordance. Hum Pathol 2019; 93:  
14 30-36.

26

- 1  
2  
3  
4  
5  
6  
7 1 30. Williams MD, Roberts DB, Kies MS, Mao L, Weber RS, El-Nagger AK. Genetic  
8  
9 2 and expression analysis of HER-2 and EGFR genes in salivary duct carcinoma:  
10  
11  
12 3 empirical and therapeutic significance. *Clin Cancer Res* 2010; 16: 2266-2274.  
13  
14  
15  
16 4 31. van Boxtel W, Locati LD, van Engen-van Grunsven ACH et al. Adjuvant androgen  
17  
18  
19 5 deprivation therapy for poor risk, androgen receptor-positive salivary duct  
20  
21  
22 6 carcinoma. *Eur J Cancer* 2019; 110: 62-70.  
23  
24  
25  
26  
27 7 32. Boon E, van Boxtel W, Buter J, et al. Androgen deprivation therapy for androgen  
28  
29  
30 8 receptor-positive advanced salivary duct carcinoma: A nationwide case series of 35  
31  
32  
33 9 patients in The Netherlands. *Head Neck* 2018; 40: 605-613.  
34  
35  
36  
37 10 33. Fushime C, Tada Y, Takahashi H, et al. A prospective phase II study of combined  
38  
39  
40 11 androgen blockage in patients with androgen receptor-positive metastatic or locally  
41  
42  
43 12 advanced unresectable salivary gland carcinoma, *Ann Oncol* 2018; 29: 979-983.  
44  
45  
46  
47 13 34. Locati LD, Perrone F, Cartelazz B et a. Activity of abiraterone in rechallenging two  
48  
49  
50 14 AR-expressing salivary gland adenocarcinoma, resistant to androgen deprivation  
51  
52  
53 15 therapy. *Cancer Biol Ther* 2014; 15: 678-682.  
54  
55  
56  
57  
58  
59  
60

27

- 1  
2  
3  
4  
5  
6  
7 1 35. Wasano K, Sakurai K, Kawasaki T, et al. Acquisition of resistance to androgen  
8  
9 2 deprivation therapy in salivary duct carcinoma: A case report. *Rare Tumor* 2018; 10:  
10  
11 3 1-5.  
12  
13  
14  
15  
16 4 36. Takahashi H, Tada Y, Saotome T, et al. Phase II trial of Trastuzumab and Docetaxel  
17  
18 5 in patients with human epidermal growth factor receptor-2-positive salivary duct  
19  
20 6 carcinoma. *J Clin Oncol* 2019; 37: 125-134.  
21  
22  
23  
24  
25  
26 7 37. Ujien MJM, Lassche G, van Engen-van-Grunsven ACH, et al. Systemic therapy in  
27  
28 8 the management of recurrent or metastatic salivary duct carcinoma: A systemic  
29  
30 9 review. *Cancer Treat Rev* 2020; 89: 102069 doi: 10.1016/j.ctrv.2020.102069.  
31  
32  
33  
34  
35  
36 10 38. Griffith CC, Thompson LD, Assaad A, et al. Salivary duct carcinoma and the  
37  
38 11 concept of early carcinoma ex pleomorphic adenoma. *Histopathology* 2014; 65:  
39  
40 12 854-860.  
41  
42  
43  
44  
45  
46 13  
47  
48  
49  
50  
51  
52  
53  
54  
55  
56  
57  
58  
59  
60

1  
2  
3  
4  
5  
6 **1 Figure legends**  
7

8  
9 **2** Figure 1. Consort diagram of the inclusion of SDC cases. All data were collected from  
10  
11  
12 **3** 18 institutions and consultation cases (K.K.) and 304 eligible cases of SDC were  
13  
14  
15 **4** ultimately selected.  
16  
17  
18  
19

20 **5**  
21  
22  
23 **6** Figure 2 (A) Overall survival (OS), (B) disease-free survival curve (DFS), and (C)  
24  
25  
26 **7** distant metastasis-free survival (DMFS) in 304 patients with SDC. The non-dotted line  
27  
28  
29 **8** represents survival probability and dotted lines show the 95% confidence interval.  
30  
31  
32 **9** Three- and five-year OS, DFS, and DMFS rates were 77.9 and 64.6%, 48.5 and 41.7%,  
33  
34  
35 **10** and 53.5 and 45.8%, respectively.  
36  
37  
38  
39  
40  
41  
42  
43

44 **12** Figure 3. Cumulative incidence of relapse (CIR) curves according to each prognostic  
45  
46  
47 **13** factor identified in the univariate analysis and multivariate Fine-Grey proportional  
48  
49  
50 **14** hazard regression model. CIR according to the site (A) ( $p < 0.001$ ), pStage (B) ( $p < 0.001$ )  
51  
52  
53 **15** and number of LN metastasis (C) ( $p < 0.001$ ).  
54  
55  
56  
57  
58  
59  
60

1 Figure 4. Cumulative incidence of distant metastasis relapse (CIDMR) curves according  
2 to each prognostic factor identified in the univariate analysis and multivariate Fine-Grey  
3 proportional hazard regression model. CIDMR according to the site (A) ( $p=0.0476$ ),  
4 pStage (B) ( $p<0.001$ ), and number of LN metastasis (C) ( $p<0.001$ ).

5  
6 Figure 5. Patterns of disease recurrence. (A) Local and regional recurrence and distant  
7 metastases in 110 patients with recurrence. The numbers in the circles represent the  
8 absolute number of patients with local and regional recurrence and the presence of  
9 distant metastases. Patients with primarily metastatic disease were not included in this  
10 figure. (B) Localization of distant metastases sorted by absolute numbers in 93 patients  
11 with distant metastases. Patients with primarily metastatic diseases were not included in  
12 this figure.

#### 13 14 **Supplemental figures**

15 Supplemental Figure 1. (A) Typical histology of a *de novo* (CXPA[-]) case showing  
16 Roman bridge structures of large atypical cells with an eosinophilic cytoplasm, and

30

1 comedonecrosis (hematoxylin & eosin stain). (B) Typical histology of a CXPA(+) case  
2 showing the co-existence of a pleomorphic adenoma (PA) circumscribed with a fibrous  
3 capsule (yellow dotted line). The intracapsular component (IC) showed the growth of  
4 atypical glandular cells within the PA component, whereas the invasive component  
5 (Inv) showed the extracapsular growth of SDC cells (hematoxylin & eosin stain).

6

7 Supplemental Figure 2. Cumulative incidence of relapse (CIR) (A), cumulative  
8 incidence of local relapse (CILR) (B), cumulative incidence of cervical lymph node  
9 relapse (CICLNR) (C), and cumulative incidence of distant metastasis relapse (CIDMR)  
10 (D). The non-dotted line represents each incidence and dotted lines show the 95%  
11 confidence interval.



Figure 1

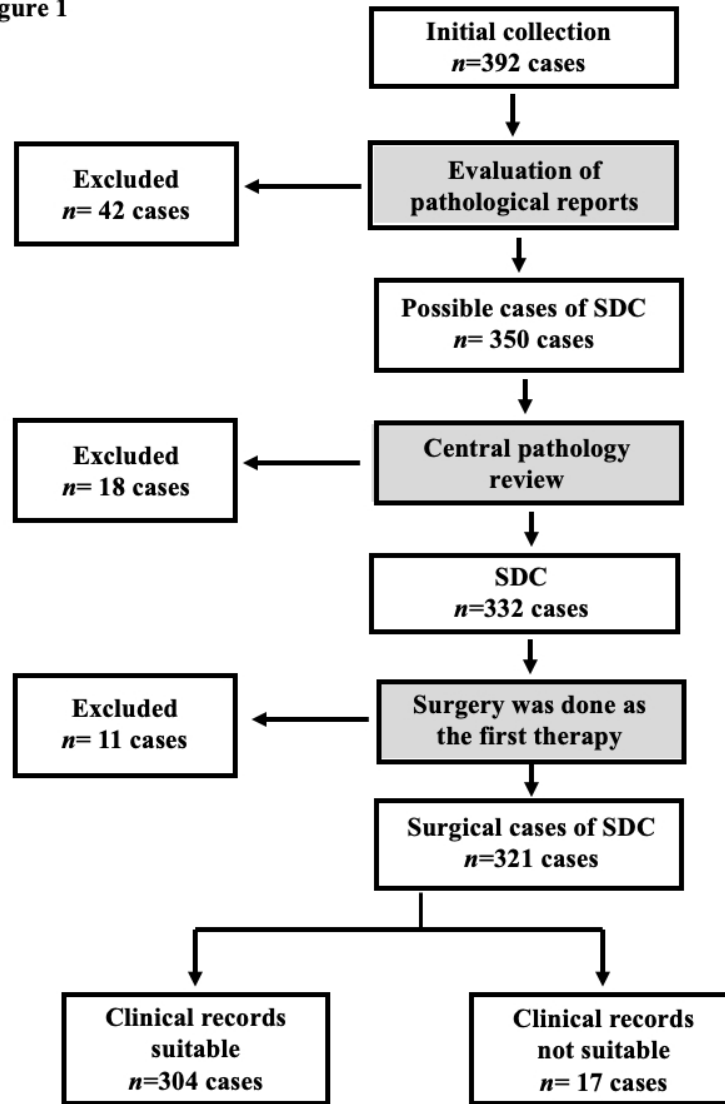

Figure 1. Consort diagram of inclusion of SDC patients. All data were collected from 18 institutions and consult cases (K.K.) and according to this diagram, eligible 304 cases of SDC were finally selected.

190x254mm (96 x 96 DPI)

1  
2  
3  
4  
5  
6  
7  
8  
9  
10  
11  
12  
13  
14  
15  
16  
17  
18  
19  
20  
21  
22  
23  
24  
25  
26  
27  
28  
29  
30  
31  
32  
33  
34  
35  
36  
37  
38  
39  
40  
41  
42  
43  
44  
45  
46  
47  
48  
49  
50  
51  
52  
53  
54  
55  
56  
57  
58  
59  
60

**Figure 2**

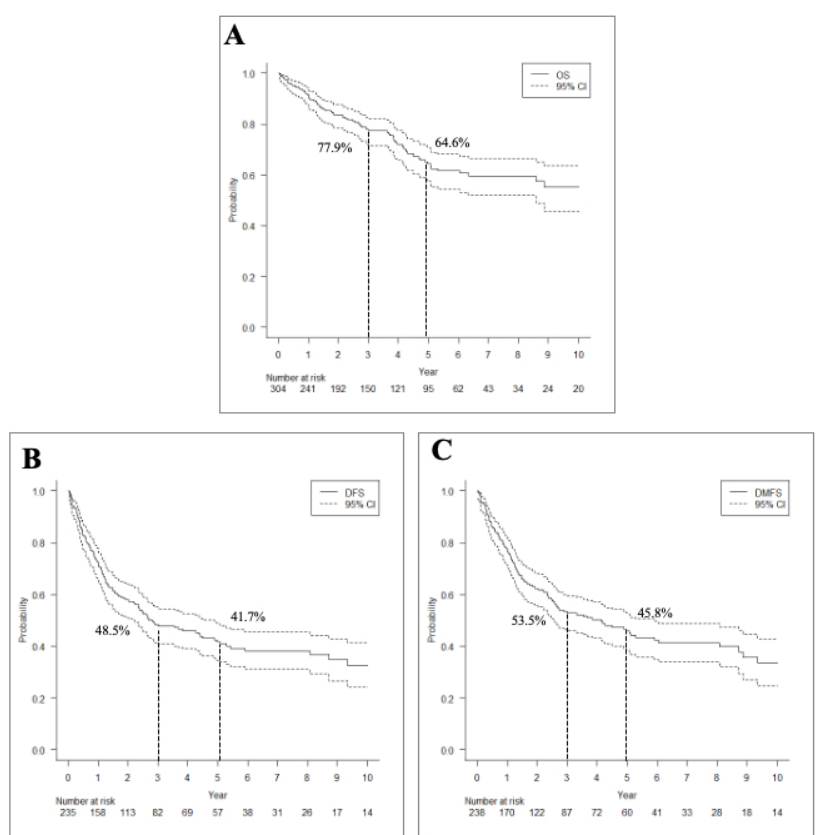

Figure 2 (A) Overall survival (OS), (B) disease free survival curve (DFS) and (C) distant metastasis free survival (DMFS) of all 304 patients with SDC. The non-dotted line represents the survival probability and the dotted lines represents the 95% confidence interval. The 3-year and 5-year OS, DFS and DMFS rates were 77.9% and 64.6%, 48.5% and 41.7%, and 53.5% and 45.8%, respectively.

190x254mm (96 x 96 DPI)

Figure 3

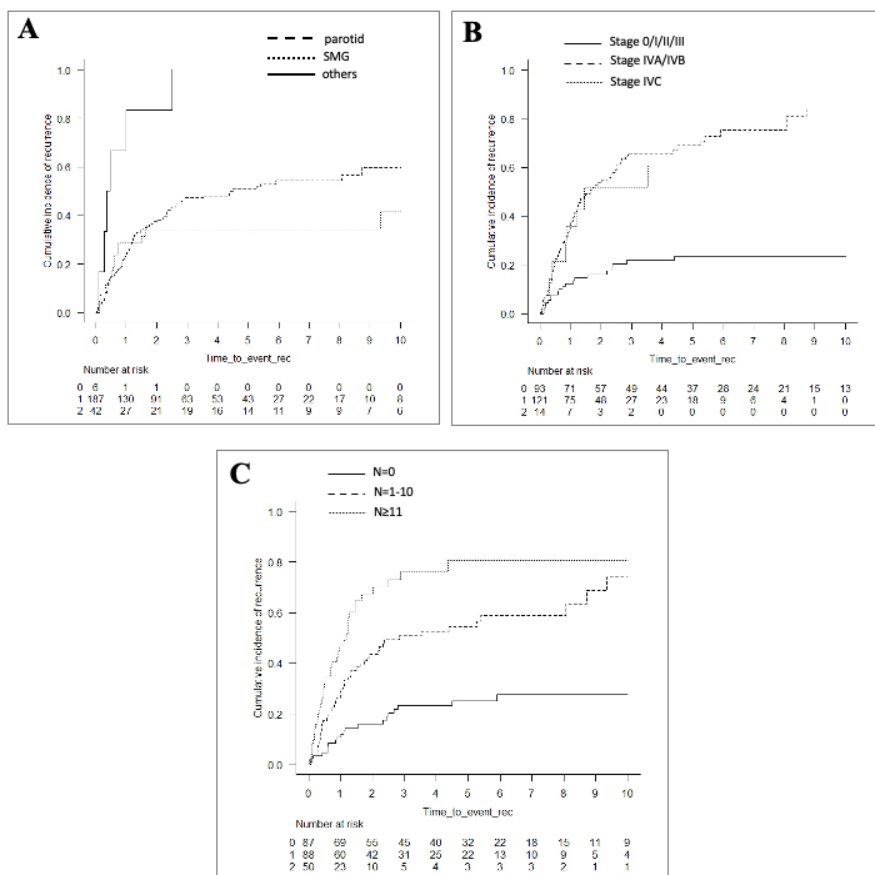

Figure 3. The cumulative incidence of relapse (CIR) curves according each of the prognostic factors that were found to be significant on both univariate analysis and multivariate Fine-Gray proportional hazard regression model are shown as follows: CIR according to the site (A) ( $p < 0.001$ ), Stage (B) ( $p < 0.001$ ) and numbers of LN metastasis (C) ( $p < 0.001$ ), respectively.

190x254mm (96 x 96 DPI)

Figure 4

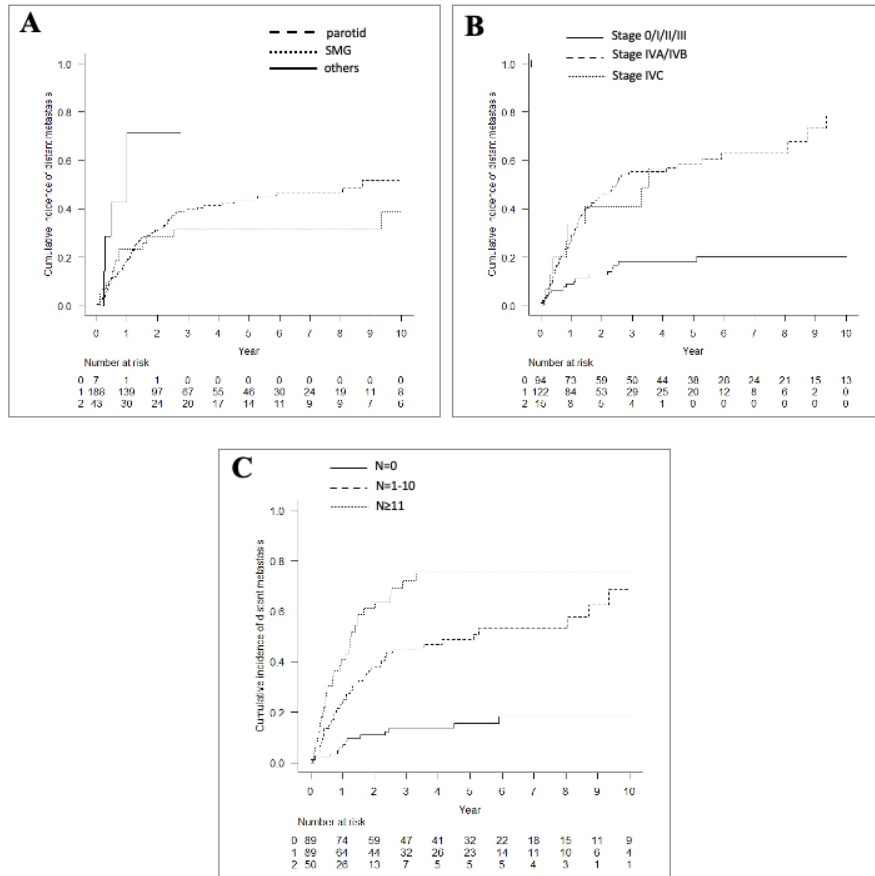

Figure 4. The cumulative incidence of distant metastasis relapse (CIDMR) curves according to each of the prognostic factors that were found to be significant on both univariate analysis and multivariate Fine-Gray proportional hazard regression model are shown as follows: CIDMR according to the site (A) ( $p=0.0476$ ), Stage (B) ( $p<0.001$ ) and numbers of LN metastases (C) ( $p<0.001$ ), respectively.

190x254mm (96 x 96 DPI)

**Figure 5**

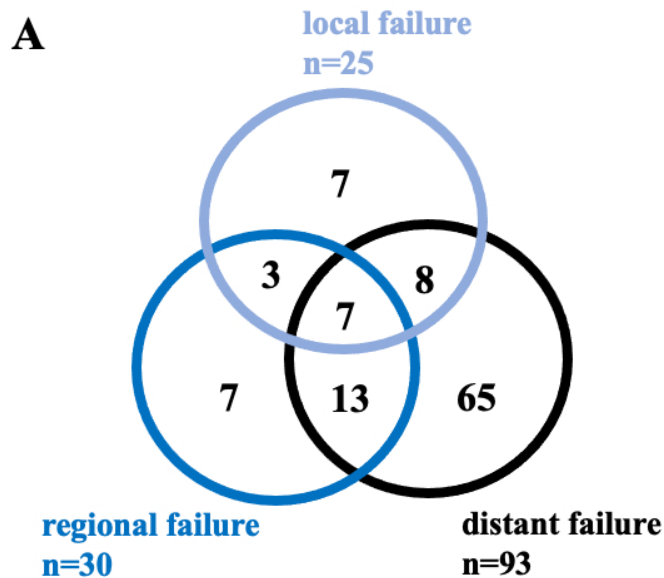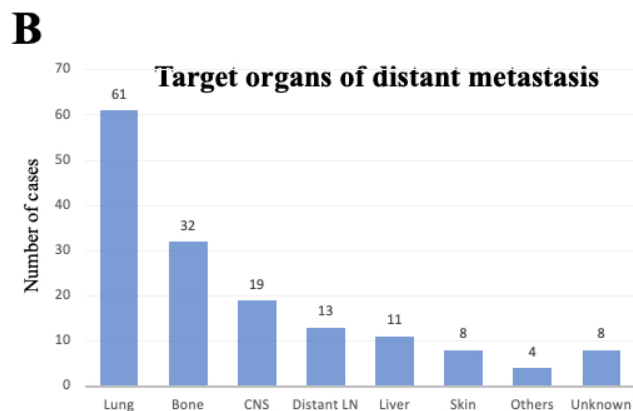

Figure 5. Patterns of disease recurrence. (A) Breakdown of local and regional recurrences and distant metastases in 110 patients with a recurrence. The numbers in the circles represent the absolute number of patients with local and regional recurrences and the presence of distant metastases. Patients with primarily metastatic disease are not included in this figure. (B) Localization of distant metastases sorted by absolute numbers of presence in 93 patients with distant metastases. Patients with primarily metastatic diseases are not included in this figure.

190x254mm (96 x 96 DPI)

Table 1. Characteristics of 304 patients with salivary duct carcinoma

|                                       | No. of patients | percentage (%) |
|---------------------------------------|-----------------|----------------|
| <b>Age(y); median=68 (27-91)</b>      |                 |                |
| ≤49                                   | 34              | 11             |
| 50-59                                 | 53              | 17             |
| 60-69                                 | 99              | 33             |
| 70-79                                 | 81              | 27             |
| ≥80                                   | 37              | 12             |
| <b>Gender</b>                         |                 |                |
| male                                  | 253             | 83             |
| female                                | 51              | 17             |
| <b>Site</b>                           |                 |                |
| parotid gland                         | 238             | 78             |
| SMG                                   | 55              | 18             |
| others                                | 11              | 3.6            |
| <b>CXPA</b>                           |                 |                |
| CXPA(-)/de novo cancer                | 121             | 40             |
| CXPA(+): IC                           | 47              | 15             |
| CXPA(+): MinI                         | 23              | 7.6            |
| CXPA(+): WI                           | 112             | 37             |
| unknown                               | 1               | 0.3            |
| <b><u>StageT factor</u></b>           |                 |                |
| <u>Stage 0—Tis</u>                    | <u>28</u>       | <u>0.72-6</u>  |
| <u>Stage I—T1</u>                     | <u>5861</u>     | <u>1920</u>    |
| <u>Stage II—T2</u>                    | <u>3371</u>     | <u>1123</u>    |
| <u>Stage III—T3</u>                   | <u>4579</u>     | <u>1526</u>    |
| <u>Stage IVA—T4</u>                   | <u>11880</u>    | <u>3926</u>    |
| <u>Stage IVB—Tx</u>                   | <u>192</u>      | <u>60.7</u>    |
| <b><u>Stage IVCN factor</u></b>       | <u>19</u>       | <u>6</u>       |
| <u>unknown—N0</u>                     | <u>10131</u>    | <u>3.343</u>   |
| <b><u>No. of LN metastasis—N1</u></b> | <u>36</u>       | <u>12</u>      |
| <u>0—N2</u>                           | <u>126108</u>   | <u>4136</u>    |
| <u>1-10—N3</u>                        | <u>10215</u>    | <u>345</u>     |
| <u>≥11—N(+)</u>                       | <u>572</u>      | <u>190.7</u>   |
| <u>unknown—Nx</u>                     | <u>1912</u>     | <u>64</u>      |

| <b>Therapy</b>                | <b>M factor</b> |             |
|-------------------------------|-----------------|-------------|
| <b><u>S</u>—<u>M0</u></b>     | <u>107281</u>   | <u>3592</u> |
| <b><u>S+POT</u>—<u>M1</u></b> | <u>19719</u>    | <u>656</u>  |

SMG, submandibular gland; CXPA, carcinoma ex pleomorphic adenoma;

IC, intracapsular; MinI, minimally invasive; WI, widely invasive;

No., number; LN, lymph node; S, surgery; POT, post-operative therapy.

\*N does not include the late cervical LN metastases.

\*\*M does not include the late distant metastases.

Table 1. Characteristics of 304 patients with salivary duct carcinoma

|                                  | <b>No. of patients</b> | <b>percentage (%)</b> |
|----------------------------------|------------------------|-----------------------|
| <b>Age(y); median=68 (27-91)</b> |                        |                       |
| ≤49                              | 34                     | 11                    |
| 50-59                            | 53                     | 17                    |
| 60-69                            | 99                     | 33                    |
| 70-79                            | 81                     | 27                    |
| ≥80                              | 37                     | 12                    |
| <b>Gender</b>                    |                        |                       |
| male                             | 253                    | 83                    |
| female                           | 51                     | 17                    |
| <b>Site</b>                      |                        |                       |
| parotid gland                    | 238                    | 78                    |
| SMG                              | 55                     | 18                    |
| others                           | 11                     | 3.6                   |
| <b>CXPA</b>                      |                        |                       |
| CXPA(-)/de novo cancer           | 121                    | 40                    |
| CXPA(+): IC                      | 47                     | 15                    |
| CXPA(+): MinI                    | 23                     | 7.6                   |
| CXPA(+): WI                      | 112                    | 37                    |
| unknown                          | 1                      | 0.3                   |
| <b>Stage</b>                     |                        |                       |
| Stage 0                          | 2                      | 0.7                   |
| Stage I                          | 58                     | 19                    |
| Stage II                         | 33                     | 11                    |
| Stage III                        | 45                     | 15                    |
| Stage IVA                        | 118                    | 39                    |
| Stage IVB                        | 19                     | 6                     |
| Stage IVC                        | 19                     | 6                     |
| unknown                          | 10                     | 3.3                   |
| <b>No. of LN metastasis</b>      |                        |                       |
| 0                                | 126                    | 41                    |
| 1-10                             | 102                    | 34                    |
| ≥11                              | 57                     | 19                    |
| unknown                          | 19                     | 6                     |



| Therapy      |     |    |
|--------------|-----|----|
| <b>S</b>     | 107 | 35 |
| <b>S+POT</b> | 197 | 65 |

SMG, submandibular gland; CXPA, carcinoma ex pleomorphic adenoma;

IC, intracapsular; MinI, minimally invasive; WI, widely invasive;

No., number; LN, lymph node; S, surgery; POT, post-operative therapy.

\*N does not include the late cervical LN metastases.

\*\*M does not include the late distant metastases.

Table 2. Univariate analyses for overall survival, cumulative incidence of recurrence and cumulative incidence of distant metastasis

|               |         | OS  |                          |                     | CIR                     |                     | CIDMR                   |                     |
|---------------|---------|-----|--------------------------|---------------------|-------------------------|---------------------|-------------------------|---------------------|
|               |         | N   | HR<br>(95%) CI           | <i>p</i> -<br>value | HR<br>(95%) CI          | <i>p</i> -<br>value | HR<br>(95%) CI          | <i>p</i> -<br>value |
| <b>Age</b>    | <65y/o  | 131 | 0.83<br>(0.55-<br>1.26)  | 0.380               | 0.79<br>(0.54-<br>1.14) | 0.200               | 0.83<br>(0.56-<br>1.25) | 0.27                |
|               | ≥65y/o. | 173 | Ref.                     |                     | Ref.                    |                     | Ref.                    |                     |
| <b>Gender</b> | female  | 51  | Ref.                     |                     | Ref.                    |                     | Ref.                    |                     |
|               | male    | 252 | 2.05<br>(1.03-<br>4.09)  | <b>0.041</b>        | 1.68<br>(0.94-<br>3.01) | 0.081               | 1.88<br>(0.98-<br>3.6)  | 0.058               |
| <b>Site</b>   | parotid | 238 | 2.33<br>(0.32-<br>16.76) | 0.402               | 0.21<br>(0.1-<br>0.44)  | <b>&lt;0.001</b>    | 0.33<br>(0.11-1)        | 0.050               |
|               | SMG     | 55  | 1.68<br>(0.22-<br>16.76) | 0.617               | 0.14<br>(0.05-<br>0.44) | <b>&lt;0.001</b>    | 0.24<br>(0.07-<br>0.86) | <b>0.023</b>        |

|             |             |     |            |                 |           |                 |           |                 |
|-------------|-------------|-----|------------|-----------------|-----------|-----------------|-----------|-----------------|
|             |             |     | 12.79)     |                 | 0.44)     |                 | 0.82)     |                 |
|             | others      | 11  | Ref.       |                 | Ref.      |                 | Ref.      |                 |
| <b>CXPA</b> | (-) de novo | 121 | Ref.       |                 | Ref.      |                 | Ref.      |                 |
|             | (+) IC/MinI | 70  | 0.6 (0.32- | 0.098           | 0.63      | 0.190           | 0.64(0.3  | 0.220           |
|             |             |     | 1.1)       |                 | (0.32-    |                 | 2-1.31)   |                 |
|             |             |     |            |                 | 1.25)     |                 |           |                 |
|             | (+) WI      | 112 | 1.12       | 0.615           | 0.91      | 0.630           | 0.77      | 0.220           |
|             |             |     | (0.72-     |                 | (0.62-    |                 | (0.5-     |                 |
|             |             |     | 1.75)      |                 | 1.34)     |                 | 1.17)     |                 |
| <b>T</b>    | Tis/pT1     | 69  | Ref.       |                 | Ref.      |                 | Ref.      |                 |
|             | T2/3        | 150 | 2.15(1.11  | <b>0.023</b>    | 2.41      | <b>0.026</b>    | 3.44      | <b>0.015</b>    |
|             |             |     | -4.15)     |                 | (1.11-    |                 | (1.27-    |                 |
|             |             |     |            |                 | 5.24)     |                 | 9.27)     |                 |
|             | T4          | 80  | 3.39       | <b>&lt;0.00</b> | 4.84(2.2  | <b>&lt;0.00</b> | 6.29      | <b>&lt;0.00</b> |
|             |             |     | (1.69-     | <b>1</b>        | 4-10.45)  | <b>1</b>        | (2.23-    | <b>1</b>        |
|             |             |     | 6.82)      |                 |           |                 | 17.06)    |                 |
| <b>N</b>    | N0          | 131 | reference  |                 | reference |                 | reference |                 |
|             | N1          | 36  | 0.98       | 0.958           | 2.21      | <b>0.018</b>    | 3.05      | <b>0.003</b>    |

1  
2  
3  
4  
5  
6  
7  
8  
9  
10  
11  
12  
13  
14  
15  
16  
17  
18  
19  
20  
21  
22  
23  
24  
25  
26  
27  
28  
29  
30  
31  
32  
33  
34  
35  
36  
37  
38  
39  
40  
41  
42  
43  
44  
45  
46  
47  
48  
49  
50  
51  
52  
53  
54  
55  
56  
57  
58  
59  
60

|              |             |     |            |                 |          |                 |        |                 |
|--------------|-------------|-----|------------|-----------------|----------|-----------------|--------|-----------------|
|              |             |     | (0.43-     |                 | (1.15-   |                 | (1.48- |                 |
|              |             |     | 2.24)      |                 | 4.25)    |                 | 6.26)  |                 |
|              | N2/N3/N(+)  | 123 | 2.9 (1.82- | <b>&lt;0.00</b> | 4.07(2.5 | <b>&lt;0.00</b> | 5.23   | <b>&lt;0.00</b> |
|              |             |     | 4.63)      | <b>1</b>        | 2-6.59)  | <b>1</b>        | (2.98- | <b>1</b>        |
|              |             |     |            |                 |          |                 | 9.18)  |                 |
| <b>M</b>     | M0          | 281 | Ref.       |                 | Ref.     |                 | Ref.   |                 |
|              | M1          | 19  | 2.578(1.5  | <b>&lt;0.00</b> | 1.32     | 0.460           | 1.43   | 0.330           |
|              |             |     | 1-5.12)    | <b>1</b>        | (0.64-   |                 | (0.69- |                 |
|              |             |     |            |                 | 2.74)    |                 | 2.95   |                 |
| <b>Stage</b> | Stage       | 138 | Ref.       |                 | Ref.     |                 | Ref.   |                 |
|              | 0/I/II/III  |     |            |                 |          |                 |        |                 |
|              | Stage IVA/B | 137 | 3.38       | <b>&lt;0.00</b> | 4.86     | <b>&lt;0.00</b> | 4.25   | <b>&lt;0.00</b> |
|              |             |     | (2.05-5.6) | <b>1</b>        | (2.9-    | <b>1</b>        | (2.47- | <b>1</b>        |
|              |             |     |            |                 | 8.14)    |                 | 7.32)  |                 |
|              | Stage IVC   | 19  | 5.61       | <b>&lt;0.00</b> | 3.56(1.5 | <b>0.004</b>    | 3.6    | <b>0.004</b>    |
|              |             |     | (2.77-     | <b>1</b>        | -8.14)   |                 | (1.52- |                 |
|              |             |     | 11.35)     |                 |          |                 | 8.53)  |                 |
| <b>No.</b>   | <b>of 0</b> | 126 | Ref.       |                 | Ref.     |                 | Ref.   | <b>0.001</b>    |

|                |       |     |            |                 |        |                 |        |                 |
|----------------|-------|-----|------------|-----------------|--------|-----------------|--------|-----------------|
| <b>LN</b>      |       |     |            |                 |        |                 |        |                 |
| <b>metasta</b> |       |     |            |                 |        |                 |        |                 |
| <b>sis</b>     |       |     |            |                 |        |                 |        |                 |
|                | 1-10  | 102 | 1.87 (1.1- | <b>0.020</b>    | 2.94   | <b>&lt;0.00</b> | 4.02   | <b>&lt;0.00</b> |
|                |       |     | 3.15)      |                 | (1.78- | <b>1</b>        | (2.23- | <b>1</b>        |
|                |       |     |            |                 | 4.88)  |                 | 7.27)  |                 |
|                | ≥11   | 57  | 4.14       | <b>&lt;0.00</b> | 5.39   | <b>&lt;0.00</b> | 7.32   | <b>&lt;0.00</b> |
|                |       |     | (2.41-     | <b>1</b>        | (3.09- | <b>1</b>        | (3.88- | <b>1</b>        |
|                |       |     | 7.11)      |                 | 9.39)  |                 | 13.81) |                 |
| <b>Therapy</b> | S     | 107 | Ref.       |                 | Ref.   |                 | Ref.   |                 |
|                | S+POT | 197 | 1.1(0.7-   | 0.669           | 1.63   | 0.055           | 2.27   | 0.006           |
|                |       |     | 1.74)      |                 | (0.99- |                 | (1.27- |                 |
|                |       |     |            |                 | 2.69)  |                 | 4.05)  |                 |

Bold shows p<0.05.

HR, hazard ratio; 95%CI, 95% confidence interval; OS, overall survival; CIR, cumulative incidence of recurrence; CIDMR, cumulative incidence of distant metastasis relapse; No, number; Ref., reference; CXPA, carcinoma ex pleomorphic

1  
2  
3  
4  
5  
6 adenoma; IC, intracapsular type; MinI, minimally invasive type; WI, widely invasive  
7  
8  
9 type; SMG, submandibular gland; LN, lymph node; S, surgery; POT, post-operative  
10  
11  
12 therapy.  
13  
14  
15  
16  
17  
18  
19  
20  
21  
22  
23  
24  
25  
26  
27  
28  
29  
30  
31  
32  
33  
34  
35  
36  
37  
38  
39  
40  
41  
42  
43  
44  
45  
46  
47  
48  
49  
50  
51  
52  
53  
54  
55  
56  
57  
58  
59  
60

For Peer Review

Table 3. Multivariate analysis for overall survival, cumulative incidence of recurrence and cumulative incidence of distant metastasis

|                         | OS               |                 | CIR              |                 | CIDMR            |                 |
|-------------------------|------------------|-----------------|------------------|-----------------|------------------|-----------------|
|                         | HR               | <i>p</i> -value | HR               | <i>p</i> -value | HR               | <i>p</i> -value |
|                         | (95% CI)         |                 | (95% CI)         |                 | (95% CI)         |                 |
| <b>Gender</b>           |                  |                 |                  |                 |                  |                 |
| <b>male</b>             | 1.54 (0.76-3.09) | 0.230           | ND               | ND              | ND               | ND              |
| <b>female</b>           | Ref.             |                 | ND               | ND              | ND               | ND              |
| <b>Site</b>             |                  |                 |                  |                 |                  |                 |
| <b>parotid gland</b>    | ND               | ND              | 0.28 (0.16-0.52) | <0.001          | 0.28 (0.14-0.59) | <0.001          |
| <b>SMG</b>              | ND               | ND              | 0.27 (0.12-0.63) | 0.003           | 0.3 (0.12-0.77)  | 0.012           |
| <b>others</b>           | ND               | ND              | Ref.             |                 | Ref.             |                 |
| <b>Stage</b>            |                  |                 |                  |                 |                  |                 |
| <b>Stage 0/I/II/III</b> | Ref.             |                 | Ref.             |                 | Ref.             |                 |

|                   |                              |                              |                              |
|-------------------|------------------------------|------------------------------|------------------------------|
| <b>Stage</b>      | 2.65 (1.44- <b>0.002</b>     | 3.35 (1.83- <b>&lt;0.001</b> | 2,42 (1.3- <b>0.005</b>      |
| <b>IVA/B</b>      | 4.88)                        | 6.14)                        | 4.49)                        |
| <b>Stage</b>      | 3.81 (1.73- <b>&lt;0.001</b> | 2.25 (0.87- 0.096            | 1.92 (0.76- 0.170            |
| <b>IVC</b>        | 8.41)                        | 5.85)                        | 4.91)                        |
| <b>No. of LN</b>  |                              |                              |                              |
| <b>metastasis</b> |                              |                              |                              |
| <b>0</b>          | Ref.                         | Ref.                         | Ref.                         |
| <b>1-10</b>       | 1.09 (0.59- 0.777            | 1.75 (1.03- <b>0.040</b>     | 2,73 (1.45- <b>0.002</b>     |
|                   | 2.02)                        | 2.99)                        | 5.14)                        |
| <b>≥11</b>        | 2,07 (1.08- <b>0.028</b>     | 2.86 (1.57- <b>&lt;0.001</b> | 4.63 (2.33- <b>&lt;0.001</b> |
|                   | 3.94)                        | 5.2)                         | 9.22)                        |

Bold shows  $p < 0.05$ .

HR, hazard ratio; 95% CI, 95% confidence interval; OS, overall survival; CIR, cumulative incidence of recurrence; CIDMR, cumulative incidence of distant metastasis relapse; Ref., reference; SMG, submandibular gland; LN, lymph node; No, number; ND, not done.

\*p-value of Wald's test relating to "recurrence coefficient=0"



Supplemental figure 1

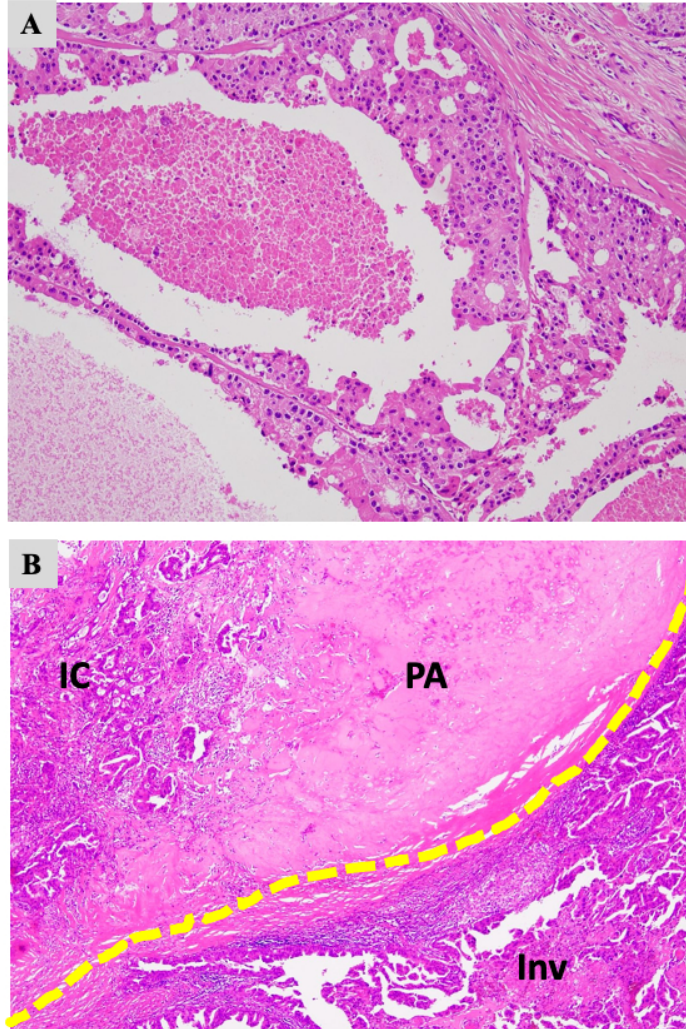

190x254mm (96 x 96 DPI)

Supplemental figure 2

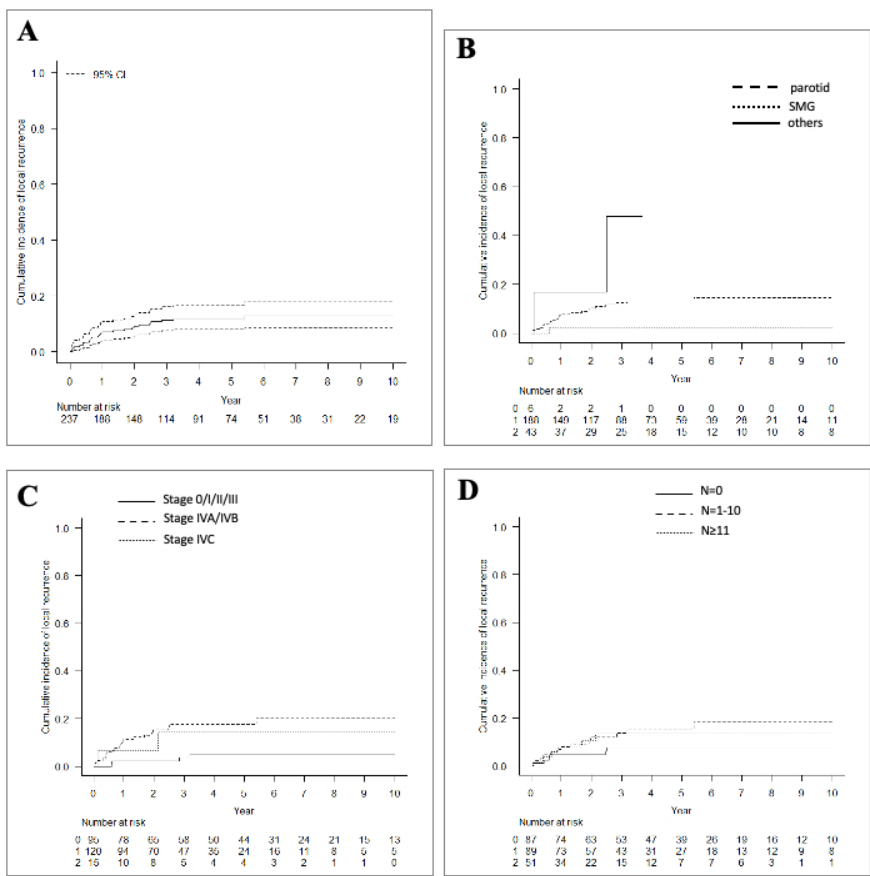

190x254mm (96 x 96 DPI)

Supplemental figure 3

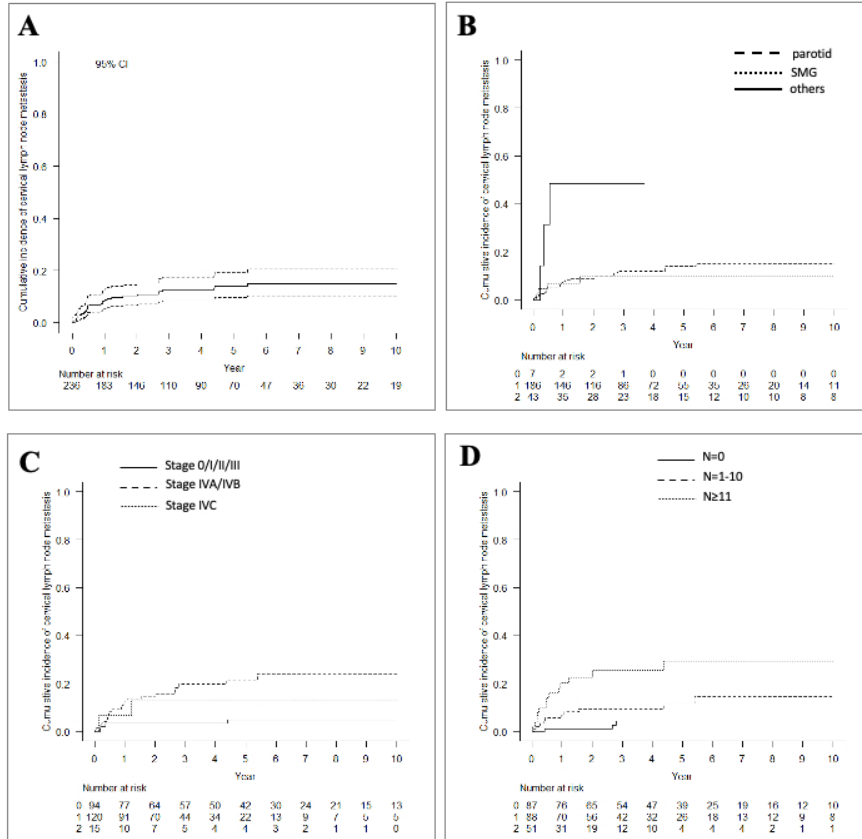

190x254mm (96 x 96 DPI)

Supplemental table 1. The summary of post-operative therapy (POT).

|                            | <b>No. of patients (n=197)</b> | <b>percentage</b> |
|----------------------------|--------------------------------|-------------------|
| <b>S→RT</b>                | 102                            | 52%               |
| <b>S→Ch<sup>*/**</sup></b> | 13                             | 6.6%              |
| <b>S→CRT<sup>**</sup></b>  | 70                             | 36%               |
| <b>S→S<sup>#</sup></b>     | 5                              | 2.5%              |
| <b>S→unknown</b>           | 7                              | 3.6%              |

S, surgery; RT, radiotherapy; Ch, chemotherapy; CRT, chemoradiotherapy.

\*Including TS-1 administration (2 cases) and S-1 administration (1 case)

\*\*Including Trastuzumab administration (6 cases), Nivolumab administration (3 case), and androgen deprivation therapy (5 cases).

#Including additional resection for local recurrence (2 cases), neck dissection (1 case), resection for distant metastasis (3 cases) and addition resection for recurrence (unknown location) (2 case).

Supplemental table 2. Univariate and multivariate analyses for cumulative incidence of local relapse (CILR) and cumulative incidence of cervical lymph node metastasis (CICLNM)

|                | Univariate analysis |               |                 |               |                 | Multivariate analysis |                 |          |                 |
|----------------|---------------------|---------------|-----------------|---------------|-----------------|-----------------------|-----------------|----------|-----------------|
|                | CILR                |               | CICLN           |               |                 | CILR                  |                 | CICLNM   |                 |
|                | No                  | HR            | <i>p</i> -value | HR            | <i>p</i> -value | HR                    | <i>p</i> -value | HR       | <i>p</i> -value |
|                |                     | (95% CI)      |                 | (95% CI)      |                 | (95% CI)              |                 | (95% CI) |                 |
| <b>Age</b>     |                     |               |                 |               |                 |                       |                 |          |                 |
| <b>&lt;65y</b> | 13                  | 0.87          | 0.72            | 0.68          | 0.280           | ND                    |                 | ND       |                 |
|                | 1                   | (0.41 - 1.87) | 0               | (0.34 - 1.37) |                 |                       |                 |          |                 |
| <b>≥65y</b>    | 17                  | Ref.          |                 | Ref.          |                 | ND                    |                 | ND       |                 |
|                | 3                   |               |                 |               |                 |                       |                 |          |                 |
| <b>Gender</b>  |                     |               |                 |               |                 |                       |                 |          |                 |

|             |    |       |      |       |       |    |    |
|-------------|----|-------|------|-------|-------|----|----|
| <b>male</b> | 25 | 1.08  | 0.89 | 1.04  | 0.940 | ND | ND |
|             | 3  | (0.37 | 0    | (0.4- |       |    |    |
|             |    | -     |      | 2.67) |       |    |    |
|             |    | 3.13) |      |       |       |    |    |

|               |    |      |  |      |  |    |    |
|---------------|----|------|--|------|--|----|----|
| <b>female</b> | 51 | Ref. |  | Ref. |  | ND | ND |
|---------------|----|------|--|------|--|----|----|

### Site

|                |    |       |             |        |              |       |             |        |             |
|----------------|----|-------|-------------|--------|--------------|-------|-------------|--------|-------------|
| <b>parotid</b> | 23 | 0.25  | 0.04        | 0.16   | <b>0.003</b> | 0.34  | <b>0.12</b> | 0.26   | <b>0.02</b> |
|                | 8  | (0.06 | 7           | (0.05- |              | (0.08 | <b>0</b>    | (0.09- | <b>0</b>    |
|                |    | -     |             | 0.55)  |              | -     |             | 0.81)  |             |
|                |    | 0.98) |             |        |              | 1.34) |             |        |             |
| <b>SMG</b>     | 55 | 0.04  | <b>0.01</b> | 0.11   | <b>0.006</b> | 0.08  | 0.03        | 0.2    | 0.05        |
|                |    | (0-   | <b>0</b>    | (0.02- |              | (0.01 | <b>0</b>    | (0.04- | 3           |
|                |    | 0.47) |             | 0.53)  |              | -     |             | 1.02)  |             |
|                |    |       |             |        |              | 0.78) |             |        |             |

|               |    |      |             |      |              |      |      |      |      |
|---------------|----|------|-------------|------|--------------|------|------|------|------|
| <b>others</b> | 11 | Ref. | <b>0.02</b> | Ref. | <b>0.009</b> | Ref. | 0.08 | Ref. | 0.05 |
|               |    |      | <b>7</b>    |      |              |      | 4    |      | 7    |

### CXPA

|               |    |      |      |      |       |    |    |
|---------------|----|------|------|------|-------|----|----|
| <b>(-)/de</b> | 12 | Ref. | 0.64 | Ref. | 0.335 | ND | ND |
|---------------|----|------|------|------|-------|----|----|

|               |   |   |  |  |  |  |
|---------------|---|---|--|--|--|--|
| <b>novo</b>   | 1 | 6 |  |  |  |  |
| <b>cancer</b> |   |   |  |  |  |  |

|               |    |       |        |              |    |    |
|---------------|----|-------|--------|--------------|----|----|
| <b>(+)IC/</b> | 70 | 1.29  | 1.99   | <b>0.003</b> | ND | ND |
| <b>MinI</b>   |    | (0.59 | (0.72- |              |    |    |
|               |    | -     | 5.51)  |              |    |    |
|               |    | 2.83) |        |              |    |    |

|              |    |       |        |       |    |    |
|--------------|----|-------|--------|-------|----|----|
| <b>(+)WI</b> | 11 | 1.26  | 1.63   | 0.230 | ND | ND |
|              | 2  | (0.76 | (0.74- |       |    |    |
|              |    | -     | 3.6)   |       |    |    |
|              |    | 2.11) |        |       |    |    |

|               |    |      |      |      |       |    |
|---------------|----|------|------|------|-------|----|
| <b>T</b>      |    |      |      |      |       |    |
| <b>Tis /1</b> | 69 | Ref. | 0.09 | Ref. | 0.262 | ND |
|               |    |      | 5    |      |       | ND |

|             |    |       |        |       |    |    |
|-------------|----|-------|--------|-------|----|----|
| <b>T2/3</b> | 15 | 3.27  | 1.14   | 0.840 | ND | ND |
|             | 0  | (0.45 | (0.32- |       |    |    |
|             |    | -     | 4.02)  |       |    |    |
|             |    | 24.0  |        |       |    |    |
|             |    | 4)    |        |       |    |    |

|           |    |       |  |        |       |    |    |
|-----------|----|-------|--|--------|-------|----|----|
| <b>T4</b> | 80 | 6.14  |  | 2.02   | 0.280 | ND | ND |
|           |    | (0.84 |  | (0.56- |       |    |    |
|           |    | -     |  | 7.31)  |       |    |    |
|           |    | 45.0  |  |        |       |    |    |
|           |    | 8)    |  |        |       |    |    |

**N**

|           |    |      |      |      |              |    |    |
|-----------|----|------|------|------|--------------|----|----|
| <b>N0</b> | 13 | Ref. | 0.09 | Ref. | <b>0.003</b> | ND | ND |
|           | 1  |      | 9    |      |              |    |    |

|           |    |       |      |        |       |    |    |
|-----------|----|-------|------|--------|-------|----|----|
| <b>N1</b> | 36 | 1.35  | 0.67 | 2.91   | 0.190 | ND | ND |
|           |    | (0.34 | 0    | (0.59- |       |    |    |
|           |    | -5.3) |      | 14.33) |       |    |    |

|             |    |       |      |        |              |    |    |
|-------------|----|-------|------|--------|--------------|----|----|
| <b>N2/3</b> | 12 | 2.62  | 0.04 | 7.2    | <b>0.001</b> | ND | ND |
|             | 3  | (1.03 | 3    | (2.15- |              |    |    |
|             |    | -     |      | 24.18) |              |    |    |
|             |    | 6.65) |      |        |              |    |    |

**M**

|           |    |       |      |        |       |    |    |
|-----------|----|-------|------|--------|-------|----|----|
| <b>M0</b> | 28 | 1.16  | 0.84 | 0.95   | 0.940 | ND | ND |
|           | 1  | (0.27 | 0    | (0.22- |       |    |    |



|  |  |       |  |       |  |  |  |  |  |
|--|--|-------|--|-------|--|--|--|--|--|
|  |  | -     |  | 4.06) |  |  |  |  |  |
|  |  | 4,93) |  |       |  |  |  |  |  |

|           |    |      |  |      |  |    |  |    |  |
|-----------|----|------|--|------|--|----|--|----|--|
| <b>M1</b> | 19 | Ref. |  | Ref. |  | ND |  | ND |  |
|-----------|----|------|--|------|--|----|--|----|--|

**Stage**

|               |    |      |  |      |              |      |      |      |      |
|---------------|----|------|--|------|--------------|------|------|------|------|
| <b>O/I/II</b> | 13 | Ref. |  | Ref. | <b>0.009</b> | Ref. | 0.05 | Ref. | 0.26 |
| <b>/ III</b>  | 8  |      |  |      |              |      | 2    |      | 8    |

|               |    |       |      |        |              |       |             |        |      |
|---------------|----|-------|------|--------|--------------|-------|-------------|--------|------|
| <b>IVA /B</b> | 13 | 4.33  | 0.00 | 5.28   | <b>0.002</b> | 3.56  | <b>0.01</b> | 3.42   | 0.13 |
|               | 7  | (1.5- | 7    | (1.82- |              | (1.28 | <b>5</b>    | (0.71- | 0    |
|               |    | 12.4  |      | 15,35) |              | -     |             | 16.55) |      |
|               |    | 6)    |      |        |              | 9.93) |             |        |      |

|            |    |       |      |        |       |       |      |        |      |
|------------|----|-------|------|--------|-------|-------|------|--------|------|
| <b>IVC</b> | 19 | 3.11  | 0.19 | 3.11   | 0.200 | 2.53  | 0.28 | 2.06   | 0.49 |
|            |    | (0.57 | 0    | (0.54- |       | (0.48 | 0    | (0,27- | 0    |
|            |    | -     |      | 17.31) |       | -     |      | 15.85) |      |
|            |    | 16.9  |      |        |       | 13.5) |      |        |      |
|            |    | 5)    |      |        |       |       |      |        |      |

**No. of**  
**LN**  
**meta.**

|                |    |       |      |        |                |     |        |      |
|----------------|----|-------|------|--------|----------------|-----|--------|------|
| <b>0</b>       | 12 | Ref.  | 0.27 | Ref.   | <b>0.001</b>   | ND. | Ref.   | 0.09 |
|                | 6  |       | 9    |        |                |     |        | 5    |
| <b>1-10</b>    | 10 | 2.19  | 0.11 | 3.9    | <b>0.035</b>   |     | 2.24   | 0.30 |
|                | 2  | (0.83 | 0    | (1.1-  |                |     | (0.49- | 0    |
|                |    | -     |      | 13.81) |                |     | 10.21) |      |
|                |    | 5.78) |      |        |                |     |        |      |
| <b>≥11</b>     | 57 | 1.84  | 0.29 | 9.21   | <b>&lt;0.0</b> |     | 4.65   | 0.06 |
|                |    | (0.59 | 0    | (2.67- | <b>01</b>      |     | (0.92- | 2    |
|                |    | -5.7) |      | 31.72) |                |     | 23.4)  |      |
| <b>Therapy</b> |    |       |      |        |                |     |        |      |
| <b>S</b>       | 10 | Ref.  |      | Ref.   |                | ND  | ND     |      |
|                | 7  |       |      |        |                |     |        |      |
| <b>S+</b>      | 19 | 0.56  | 0.27 | 0.93   | 0.850          | ND  | ND     |      |
| <b>POT</b>     | 7  | (0.26 | 3    | (0.43  |                |     |        |      |
|                |    | -     |      | -      |                |     |        |      |
|                |    | 1.24) |      | 2.03)  |                |     |        |      |

Bold shows p<0.05.

HR, hazard ratio; 95%CI, 95% confidence interval; CILR, cumulative incidence of

1  
2  
3  
4  
5  
6 local relapse; CICALNM, cumulative incidence of cervical lymph node metastasis; Ref.,  
7  
8  
9 reference; No, number; CXPA, carcinoma ex pleomorphic adenoma; IC,  
10  
11  
12 intracapsular type; MinI, minimally invasive type; WI, widely invasive type; SMG,  
13  
14  
15 submandibular gland; LN, lymph node; S, surgery; POT, post-operative therapy;  
16  
17  
18 ND, not done.  
19  
20  
21  
22  
23  
24  
25  
26  
27  
28  
29  
30  
31  
32  
33  
34  
35  
36  
37  
38  
39  
40  
41  
42  
43  
44  
45  
46  
47  
48  
49  
50  
51  
52  
53  
54  
55  
56  
57  
58  
59  
60

For Peer Review
